# Supplementary material for: Global Transcriptional Profiling of Longitudinal Clinical Isolates of Mycobacterium tuberculosis Exhibiting Rapid Accumulation of Drug Resistance
Source: PLoS One. 2013 Jan 23;8(1):e54717. doi: 10.1371/journal.pone.0054717 (PMC3552959; doi:10.1371/journal.pone.0054717)
Supplement: Table S1 — List of genes differentially expressed between longitudinally collected clinical isolates of the same genotype. (XLS) [file pone.0054717.s001.xls]

## Sheet: MDR MANU1 vs DS MANU1
Differentially expressed genes of MDR MANU1 as compared to DS MANU1
Gene Accession Number	GeneSymbol	Description	*Fold Change	Regulation	p-value
Rv0667[0]	rpoB	DNA-directed RNA polymerase subunit beta	2.96766	Up	0.000392
Rv0756c[0]	-	Putative uncharacterized protein	2.23533	Up	0.0173766
Rv0830[0]	-	Putative S-adenosyl-L-methionine-dependent methyltransferase Rv0830/MT0851	2.24492	Up	0.012711
Rv1144[0]	-	Oxidoreductase, short-chain dehydrogenase/reductase family	2.18663	Up	0.0228257
Rv1687c[0]	-	Antibiotic resistance ABC transporter, efflux system, ATP-binding protein	7.27882	Up	0.00201154
Rv1788[0]	PE18	PE FAMILY PROTEIN	2.2965	Up	0.0212364
Rv1871c[0]	-	Putative uncharacterized protein	2.94725	Up	0.023931
Rv2137c[0]	-	Putative uncharacterized protein	2.45158	Up	0.017846
Rv2936[0]	drrA	Antibiotic resistance ABC transporter, efflux system, ATP-binding protein	6.90748	Up	0.00737582
Rv3065[0]	mmr	Multidrug resistance protein mmr	3.83144	Up	0.0113106
Rv3093c[0]	-	HYPOTHETICAL OXIDOREDUCTASE	2.12986	Up	0.0345864
Rv3219[0]	whiB1	PROBABLE TRANSCRIPTIONAL REGULATORY PROTEIN WHIB-LIKE WHIB1	13.6416	Up	0.00736266
Rv3881c[0]	mtb48	Antigen MTB48	2.85268	Up	0.0436486
Rv3911[0]	sigM	POSSIBLE ALTERNATIVE RNA POLYMERASE SIGMA FACTOR SIGM	5.1046	Up	0.00403744
TBFG_11219[0]	TBFG_11219, TBFG_01201	PE family protein	2.81293	Up	0.0125903
Rv0005[0]	gyrB	DNA gyrase subunit B	2.5826	Down	0.0142157
Rv0006[0]	gyrA	DNA gyrase subunit A	4.08772	Down	0.0227711
Rv0400c[0]	fadE7	ACYL-CoA DEHYDROGENASE FADE7	2.30551	Down	0.0262622
Rv0456c[0]	echA2	ENOYL-CoA HYDRATASE ECHA2 (ENOYL HYDRASE) (UNSATURATED ACYL-CoA HYDRATASE) (CROTONASE)	2.51184	Down	0.00198552
Rv0630c[0]	recB	Exodeoxyribonuclease V beta chain	7.18884	Down	0.000847
Rv1457c[0]	-	ABC-type efflux system, permease protein	7.53944	Down	0.00173234
Rv1633[0]	uvrB	UvrABC system protein B	6.42716	Down	0.000413
Rv1686c[0]	-	Antibiotic resistance ABC transporter, efflux protein	3.68839	Down	0.000339
Rv2025c[0]	-	Cation efflux system protein	5.45009	Down	0.0138667
Rv2082[0]	-	Uncharacterized protein Rv2082	2.21406	Down	0.019385
Rv2184c[0]	-	Putative uncharacterized protein	2.08718	Down	0.0073076
Rv2619c[0]	-	Putative uncharacterized protein	2.04657	Down	0.0305553
Rv2737c[0]	recA	Protein recA	6.04539	Down	0.00156741
Rv2770c[0]	ppe44	Uncharacterized PPE family protein PPE44	2.00983	Down	0.0456179
Rv2934[0]	ppsD	PHENOLPTHIOCEROL SYNTHESIS TYPE-I POLYKETIDE SYNTHASE PPSD	3.45612	Down	0.0396962
Rv2937[0]	drrB	Antibiotic resistance ABC transporter, efflux protein	4.10321	Down	0.000405
Rv2968c[0]	-	PROBABLE CONSERVED INTEGRAL MEMBRANE PROTEIN	2.0537	Down	0.0223242
Rv3014c[0]	ligA	DNA ligase	6.00685	Down	0.0241992
Rv3177[0]	-	POSSIBLE PEROXIDASE (NON-HAEM PEROXIDASE)	3.01616	Down	0.0439033
Rv3515c[0]	fadD19	PROBABLE FATTY-ACID-CoA LIGASE FADD19 (FATTY-ACID-CoA SYNTHETASE) (FATTY-ACID-CoA SYNTHASE)	2.18908	Down	0.0247519
Rv3793[0]	embC	Probable arabinosyltransferase C	3.63946	Down	0.000215
		* Fold Change is defined as the ratio of normalized signal intensites of MDR and DS MANU1

## Sheet: MDR CAS vs DS CAS
Differentially expressed genes of MDR CAS as compared to DS CAS
Gene Accession Number	GeneSymbol	Description	*Fold Change	Regulation	p-value
Rv0626[0]	-	Putative uncharacterized protein	2.0288	Up	0.037
Rv3371[0]	-	UPF0089 protein Rv3371/MT3481	2.0462	Up	0.015
Rv2777c[0]	-	Putative uncharacterized protein	2.0595	Up	0.036
Rv2427c[0]	proA	Gamma-glutamyl phosphate reductase	2.0618	Up	0.031
	SM_11	Unknown	2.0709	Up	0.044
Rv2736c[0]	recX	Regulatory protein recX	2.1198	Up	0.005
Rv1540[0]	-	Uncharacterized RNA pseudouridine synthase Rv1540/MT1592	2.1244	Up	0.026
Rv0677c[0]	mmpS5	Putative membrane protein mmpS5	2.1402	Up	0.002
Rv0282[0]	-	Uncharacterized protein Rv0282/MT0295	2.1694	Up	0.003
Rv0302[0]	-	PROBABLE TRANSCRIPTIONAL REGULATORY PROTEIN (PROBABLY TETR/ACRR-FAMILY)	2.1925	Up	0.039
Rv1925[0]	fadD31	PROBABLE ACYL-CoA LIGASE FADD31 (ACYL-COA SYNTHETASE) (ACYL-CoA SYNTHASE)	2.2484	Up	0.014
Rv0863[0]	-	Putative uncharacterized protein	2.2928	Up	0.012
Rv2472[0]	-	Putative uncharacterized protein	2.2964	Up	0.009
Rv3217c[0]	-	PROBABLE CONSERVED INTEGRAL MEMBRANE PROTEIN	2.3052	Up	0.027
TBMG_00064[0]	TBMG_00064	antitoxin	2.4149	Up	0.008
Rv3891c[0]	esxD	POSSIBLE ESAT-6 LIKE PROTEIN ESXD	2.5495	Up	0.02
Rv2255c[0]	-	Putative uncharacterized protein	2.6766	Up	0.024
Rv3583c[0]	-	POSSIBLE TRANSCRIPTION FACTOR	2.6834	Up	0.049
Rv2094c[0]	tatA	Sec-independent protein translocase protein tatA/E homolog	2.6874	Up	0.001
Rv3188[0]	-	Putative uncharacterized protein	2.8737	Up	0.05
Rv1148c[0]	-	Uncharacterized protein Rv1148c/MT1183	2.9565	Up	0.009
Rv2954c[0]	-	Putative uncharacterized protein	2.9755	Up	0.025
Rv2745c[0]	-	DNA-binding protein, putative	2.9913	Up	0.046
Rv0502[0]	-	Uncharacterized protein Rv0502/MT0523	3.0427	Up	0.011
Rv3642c[0]	-	Putative uncharacterized protein	3.3791	Up	0.046
Rv3854c[0]	ethA	MONOOXYGENASE ETHA	3.4531	Up	0.036
ACTB	ACTB	Rattus norvegicus actin, beta	3.4549	Up	0.023
Rv2714[0]	-	CONSERVED HYPOTHETICAL ALANINE AND LEUCINE RICH PROTEIN	3.4567	Up	0.037
Rv2016[0]	-	Putative uncharacterized protein	3.6158	Up	0.007
Rv3290c[0]	lat	Probable L-lysine-epsilon aminotransferase	3.814	Up	0.044
Rv0006[0]	gyrA	DNA gyrase subunit A	3.9677	Up	0.008
Rv1883c[0]	-	Putative uncharacterized protein	3.9798	Up	0.04
Rv1593c[0]	-	Putative uncharacterized protein	3.9887	Up	0.034
Rv3161c[0]	-	POSSIBLE DIOXYGENASE	4.0902	Up	0.044
Rv1884c[0]	rpfC	PROBABLE RESUSCITATION-PROMOTING FACTOR RPFC	4.3751	Up	0.036
Rv0515[0]	-	CONSERVED 13E12 REPEAT FAMILY PROTEIN	4.6821	Up	0.045
Rv2792c[0]	-	IS1602, resolvase	4.7253	Up	0.036
Rv2166c[0]	mraZ	Protein mraZ	4.9326	Up	0.016
Rv2720[0]	lexA	LexA repressor	5.1381	Up	0.004
Rv2934[0]	ppsD	PHENOLPTHIOCEROL SYNTHESIS TYPE-I POLYKETIDE SYNTHASE PPSD	5.4655	Up	0.002
Rv1945[0]	-	Uncharacterized protein Rv1945/MT1995	5.4741	Up	0.039
Rv0108c[0]	-	Putative uncharacterized protein	5.6211	Up	0.037
Rv2827c[0]	-	Putative uncharacterized protein	5.9369	Up	0.038
Rv3219[0]	whiB1	PROBABLE TRANSCRIPTIONAL REGULATORY PROTEIN WHIB-LIKE WHIB1	10.8514	Up	0.004
Rv1994c[0]	cmtR	HTH-type transcriptional regulator cmtR	26.1922	Up	0.042
Rv3615c[0]	-	Uncharacterized protein Rv3615c/MT3717	2.0052	Down	0.001
Rv0991c[0]	-	CONSERVED HYPOTHETICAL SERINE RICH PROTEIN	2.0405	Down	0.036
Rv1983[0]	PE_PGRS35	Uncharacterized PE-PGRS family protein PE_PGRS35	2.0988	Down	0.032
Rv0049[0]	-	Uncharacterized protein Rv0049/MT0055	2.1075	Down	0.012
Rv0702[0]	rplD	50S ribosomal protein L4	2.1388	Down	0.046
Rv3831[0]	-	Putative uncharacterized protein	2.1819	Down	0.004
Rv2450c[0]	rpfE	PROBABLE RESUSCITATION-PROMOTING FACTOR RPFE	2.1836	Down	0.047
Rv2150c[0]	ftsZ	Cell division protein ftsZ	2.2481	Down	0.038
Rv2029c[0]	pfkB	Carbohydrate kinase, PfkB family	2.2593	Down	0.004
Rv1467c[0]	fadE15	Acyl-CoA dehydrogenase, putative	2.262	Down	0.03
Rv1841c[0]	-	Uncharacterized protein Rv1841c/MT1889	2.3085	Down	0.025
Rv1589[0]	bioB	Biotin synthase	2.3298	Down	0.009
Rv0555[0]	menD	2-succinyl-5-enolpyruvyl-6-hydroxy-3-cyclohexene-1-carboxylate synthase	2.5364	Down	0.012
Rv2988c[0]	leuC	3-isopropylmalate dehydratase large subunit	2.5508	Down	0.012
Rv2199c[0]	ctaF	Probable cytochrome c oxidase polypeptide 4	2.5509	Down	0.02
Rv2345[0]	-	POSSIBLE CONSERVED TRANSMEMBRANE PROTEIN	2.5627	Down	0.01
Rv3882c[0]	-	POSSIBLE CONSERVED MEMBRANE PROTEIN	2.5706	Down	0.029
Rv0706[0]	rplV	50S ribosomal protein L22	2.8189	Down	0.001
Rv2623[0]	TB31.7	Putative uncharacterized protein TB31.7	2.8951	Down	0.039
Rv3842c[0]	glpQ1	PROBABLE GLYCEROPHOSPHORYL DIESTER PHOSPHODIESTERASE GLPQ1 (GLYCEROPHOSPHODIESTER PHOSPHODIESTERASE)	2.9871	Down	0.015
Rv1686c[0]	-	Antibiotic resistance ABC transporter, efflux protein	3.0484	Down	0.034
Rv1735c[0]	-	HYPOTHETICAL MEMBRANE PROTEIN	3.0595	Down	0.016
MT1356[0]	MT1356	Putative uncharacterized protein	3.1136	Down	0.017
Rv1458c[0]	-	ABC-type efflux protein, ATP-binding protein	3.2265	Down	0.024
Rv1630[0]	rpsA	30S ribosomal protein S1	3.43	Down	0.003
Rv3879c[0]	-	HYPOTHETICAL ALANINE AND PROLINE RICH PROTEIN	3.8575	Down	0.001
Rv0723[0]	rplO	50S ribosomal protein L15	4.4161	Down	0.049
Rv2030c[0]	-	Putative uncharacterized protein	4.4584	Down	0.007
Rv0569[0]	-	Putative uncharacterized protein	4.6001	Down	0.001
Rv2596[0]	-	Uncharacterized protein Rv2596/MT2672	4.6451	Down	0.036
Rv0667[0]	rpoB	DNA-directed RNA polymerase subunit beta	5.1845	Down	0.022
Rv2031c[0]	hspX	14 kDa antigen	5.5691	Down	0.021
Rv2936[0]	drrA	Antibiotic resistance ABC transporter, efflux system, ATP-binding protein	6.2522	Down	0.008
Rv0630c[0]	recB	Exodeoxyribonuclease V beta chain	6.5765	Down	0.005
Rv2025c[0]	-	Cation efflux system protein	6.835	Down	0.004
Rv1633[0]	uvrB	UvrABC system protein B	7.0495	Down	0.004
Rv1634[0]	-	Drug transporter, putative	7.5137	Down	0.007
MT2466[0]	MT2466	Putative uncharacterized protein	7.6441	Down	0.02
Rv2846c[0]	efpA	Efflux protein	8.3123	Down	0.003
Rv3715c[0]	recR	Recombination protein recR	8.4028	Down	0.025
Rv2937[0]	drrB	Antibiotic resistance ABC transporter, efflux protein	8.6763	Down	0.023
Rv2694c[0]	-	Putative uncharacterized protein	8.6898	Down	0.036
Rv3793[0]	embC	Probable arabinosyltransferase C	8.8649	Down	0.022
Rv1813c[0]	-	Uncharacterized protein Rv1813c/MT1861	8.8871	Down	0.027
Rv1738[0]	-	Uncharacterized protein Rv1738/MT1780	9.0297	Down	0.03
Rv3065[0]	mmr	Multidrug resistance protein mmr	9.2517	Down	0.023
Rv2626c[0]	-	CBS domain protein	10.5315	Down	0.043
Rv1221[0]	sigE	ALTERNATIVE RNA POLYMERASE SIGMA FACTOR SIGE	12.1597	Down	0.001
Rv3014c[0]	ligA	DNA ligase	12.2714	Down	0.012
Rv1638[0]	uvrA	UvrABC system protein A	12.4696	Down	0.006
Rv3143[0]	-	PROBABLE RESPONSE REGULATOR	13.7523	Down	0.038
Rv0005[0]	gyrB	DNA gyrase subunit B	15.3203	Down	0.022
Rv2007c[0]	fdxA	Ferredoxin	20.0218	Down	0.027
		* Fold Change is defined as the ratio of normalized signal intensites of of MDR and DS CAS

## Sheet: MDR Beijing vs DS Beijing
Differentially expressed genes of MDR Beijing as compared to DS Beijing
Gene Accession Number	GeneSymbol	Description	*Fold Change	Regulation	p-value
Rv0005[0]	gyrB	DNA gyrase subunit B	4.0207	Up	0.028
Rv0568[0]	CYP135B1	Putative cytochrome P450 135B1	2.0398	Up	0.045
Rv0626[0]	-	Putative uncharacterized protein	2.1343	Up	0.025
Rv0767c[0]	-	Uncharacterized HTH-type transcriptional regulator Rv0767c/MT0791	2.3227	Up	0.039
Rv1221[0]	sigE	ALTERNATIVE RNA POLYMERASE SIGMA FACTOR SIGE	8.9127	Up	0.035
Rv1686c[0]	-	Antibiotic resistance ABC transporter, efflux protein	4.4705	Up	0.025
Rv2094c[0]	tatA	Sec-independent protein translocase protein tatA/E homolog	4.0831	Up	0.039
Rv2429[0]	ahpD	Alkyl hydroperoxide reductase ahpD	2.3777	Up	0.043
Rv2442c[0]	rplU	50S ribosomal protein L21	2.3014	Up	0.042
Rv2839c[0]	infB	Translation initiation factor IF-2	4.4504	Up	0.049
Rv2936[0]	drrA	Antibiotic resistance ABC transporter, efflux system, ATP-binding protein	4.086	Up	0.025
Rv2937[0]	drrB	Antibiotic resistance ABC transporter, efflux protein	4.4393	Up	0.033
Rv3414c[0]	sigD	Probable RNA polymerase sigma-D factor	13.7487	Up	0.005
MT1040.1[0]	MT1040.1	Putative uncharacterized protein	5.3599	Down	0.037
Rv0003[0]	recF	DNA replication and repair protein recF	14.6127	Down	0.004
Rv0058[0]	dnaB	Replicative DNA helicase	3.2354	Down	0.014
Rv0141c[0]	-	Putative uncharacterized protein	3.6617	Down	0.03
Rv0187[0]	-	PROBABLE O-METHYLTRANSFERASE	2.0579	Down	0.036
Rv0340[0]	-	Putative uncharacterized protein	2.9228	Down	0.041
Rv0630c[0]	recB	Exodeoxyribonuclease V beta chain	23.6617	Down	0.005
Rv0735[0]	sigL	RNA polymerase sigma factor	15.0275	Down	0.002
Rv0783c[0]	emrB	POSSIBLE MULTIDRUG RESISTANCE INTEGRAL MEMBRANE EFFLUX PROTEIN EMRB	6.0008	Down	0.035
Rv0875c[0]	-	Uncharacterized protein Rv0875c/MT0898	3.9151	Down	0.045
Rv0876c[0]	-	Uncharacterized protein Rv0876c/MT0899	2.2087	Down	0.01
Rv1127c[0]	ppdK	PROBABLE PYRUVATE, PHOSPHATE DIKINASE PPDK	2.3872	Down	0.013
Rv1140[0]	-	PROBABLE INTEGRAL MEMBRANE PROTEIN	2.9266	Down	0.015
Rv1266c[0]	pknH	Probable serine/threonine-protein kinase pknH	3.9513	Down	0.011
Rv1328[0]	glgP	Glycogen phosphorylase	2.0628	Down	0.007
Rv1476[0]	-	POSSIBLE MEMBRANE PROTEIN	3.7386	Down	0.015
Rv1712[0]	cmk	Cytidylate kinase	4.0046	Down	0.021
Rv1766[0]	-	Putative uncharacterized protein	5.32	Down	0.019
Rv2310[0]	-	Uncharacterized protein Rv2310/MT2372	2.8122	Down	0.043
Rv2357c[0]	glyQS	Glycyl-tRNA synthetase	7.0898	Down	0.017
Rv2518c[0]	lppS	PROBABLE CONSERVED LIPOPROTEIN LPPS	3.3831	Down	0.019
Rv2592c[0]	ruvB	Holliday junction ATP-dependent DNA helicase ruvB	5.3627	Down	0.018
Rv2728c[0]	-	CONSERVED HYPOTHETICAL ALANINE RICH PROTEIN	7.6924	Down	0
Rv2904c[0]	rplS	50S ribosomal protein L19	2.6991	Down	0.003
Rv3088[0]	-	UPF0089 protein Rv3088/MT3173	4.158	Down	0.018
Rv3464[0]	rmlB	dTDP-glucose 4,6-dehydratase	4.302	Down	0.013
Rv3535c[0]	mhpF	Acetaldehyde dehydrogenase	2.8589	Down	0.012
Rv3607c[0]	folB	Probable dihydroneopterin aldolase	2.2663	Down	0.019
Rv3698[0]	-	Putative uncharacterized protein	2.1106	Down	0.006
Rv3701c[0]	-	Putative uncharacterized protein	2.3589	Down	0.004
Rv3911[0]	sigM	POSSIBLE ALTERNATIVE RNA POLYMERASE SIGMA FACTOR SIGM	16.1437	Down	0.007
Rv3919c[0]	rsmG	Ribosomal RNA small subunit methyltransferase G	3.398	Down	0.029
		* Fold Change is defined as the ratio of normalized signal intensites of of MDR and DS Beijing
