# Supplementary material for: Global Transcriptional Profiling of Longitudinal Clinical Isolates of Mycobacterium tuberculosis Exhibiting Rapid Accumulation of Drug Resistance
Source: PLoS One. 2013 Jan 23;8(1):e54717. doi: 10.1371/journal.pone.0054717 (PMC3552959; doi:10.1371/journal.pone.0054717)
Supplement: Table S2 — List of genes differentially expressed between all clinical isolates and H37Rv. (XLS) [file pone.0054717.s002.xls]

## Sheet: DS MANU1 vs H37Rv
Differentially expressed genes of drug susceptible MANU1 clinical isolates of Mtb as compared to H37Rv
Gene Accession Number	GeneSymbol	Description	*Fold Change	Regulation	p-value
JTY_1780[0]	JTY_1780	hypothetical protein	3.68918	Down	0.0175603
JTY_2636[0]	PE_PGRS45a	PE-PGRS family protein	7.92601	Down	0.00601115
MRA_1773[0]	MRA_1773	Putative uncharacterized protein	2.01403	Down	0.0415333
MT0270.2[0]	MT0270.2	Putative uncharacterized protein	2.28237	Down	0.00795801
MT2423.1[0]	MT2423.1	Putative uncharacterized protein	3.64731	Down	0.000199
MT2586.1[0]	MT2586.1	Putative uncharacterized protein	3.35322	Down	0.0445704
MT2627.1[0]	MT2627.1	Putative uncharacterized protein	4.64511	Down	1.13e-05
MT3013[0]	MT3013	Putative uncharacterized protein	3.13405	Down	0.0149777
MT3174.1[0]	MT3174.1	Putative uncharacterized protein	2.4649	Down	0.0109591
MT3220.2[0]	MT3220.2	Putative uncharacterized protein	2.36503	Up	0.00113353
MT3560[0]	MT3560	Putative uncharacterized protein	4.03922	Down	0.000414
Rv0005[0]	gyrB	DNA gyrase subunit B	3.26807	Down	0.00952289
Rv0006[0]	gyrA	DNA gyrase subunit A	2.41886	Up	0.0202571
Rv0009[0]	ppiA	Probable peptidyl-prolyl cis-trans isomerase A	2.85079	Up	0.0104951
Rv0016c[0]	pbpA	Penicillin-binding protein A	2.78769	Down	0.0159231
Rv0029[0]	-	Putative uncharacterized protein	2.45358	Down	0.00574113
Rv0065[0]	-	Putative uncharacterized protein	2.37953	Down	2.81e-05
Rv0075[0]	-	Aminotransferase, class I	2.34576	Down	0.0413238
Rv0097[0]	-	Putative dioxygenase Rv0097/MT0106	4.76175	Down	0.00137002
Rv0101[0]	nrp	PROBABLE PEPTIDE SYNTHETASE NRP (PEPTIDE SYNTHASE)	2.44539	Down	0.00732237
Rv0135c[0]	-	POSSIBLE TRANSCRIPTIONAL REGULATORY PROTEIN	3.20676	Down	0.0203592
Rv0138[0]	-	Putative uncharacterized protein	3.19039	Down	0.00278598
Rv0139[0]	-	Dihydroflavonol 4-reductase-related protein	3.54051	Down	0.0153673
Rv0142[0]	-	Putative uncharacterized protein	5.69526	Down	0.0032665
Rv0154c[0]	fadE2	PROBABLE ACYL-CoA DEHYDROGENASE FADE2	2.36171	Down	0.0417319
Rv0161[0]	-	POSSIBLE OXIDOREDUCTASE	3.13901	Down	0.00133456
Rv0168[0]	yrbE1B	CONSERVED HYPOTHETICAL INTEGRAL MEMBRANE PROTEIN YRBE1B	2.41135	Down	0.000628
Rv0180c[0]	-	PROBABLE CONSERVED TRANSMEMBRANE PROTEIN	4.34173	Down	0.0490284
Rv0183[0]	-	POSSIBLE LYSOPHOSPHOLIPASE	2.6378	Down	0.0363747
Rv0186[0]	bglS	Beta-glucosidase, putative	3.79957	Down	0.0115531
Rv0192.1[0]	-	CONSERVED SECRETED PROTEIN	2.21925	Down	0.0438398
Rv0196[0]	-	Uncharacterized HTH-type transcriptional regulator Rv0196/MT0206	3.79107	Down	0.00481749
Rv0216[0]	-	Putative uncharacterized protein	2.40659	Down	0.00191268
Rv0233[0]	-	R2-like ligand binding oxidase	3.23537	Down	0.00861723
Rv0249c[0]	-	PROBABLE SUCCINATE DEHYDROGENASE [MEMBRANE ANCHOR SUBUNIT] (SUCCINIC DEHYDROGENASE)	3.91196	Down	0.0153899
Rv0250c[0]	-	Putative uncharacterized protein	3.09187	Down	0.0242521
Rv0302[0]	-	PROBABLE TRANSCRIPTIONAL REGULATORY PROTEIN (PROBABLY TETR/ACRR-FAMILY)	3.6542	Down	0.00880183
Rv0312[0]	-	CONSERVED HYPOTHETICAL PROLINE AND THREONINE RICH PROTEIN	4.25194	Down	0.000136
Rv0316[0]	-	Muconolactone isomerase, putative	3.67703	Down	0.003509
Rv0331[0]	-	POSSIBLE DEHYDROGENASE/REDUCTASE	4.96576	Down	0.00503695
Rv0332[0]	-	Putative uncharacterized protein	2.58009	Down	0.0465182
Rv0335c[0]	PE6	PE FAMILY PROTEIN	2.62223	Down	0.0182415
Rv0347[0]	-	PROBABLE CONSERVED MEMBRANE PROTEIN	2.31843	Down	0.04838
Rv0353[0]	hspR	PROBABLE HEAT SHOCK PROTEIN TRANSCRIPTIONAL REPRESSOR HSPR (MERR FAMILY)	2.95286	Down	0.0407058
Rv0354c[0]	PPE7	PPE FAMILY PROTEIN	3.97076	Down	0.00844833
Rv0360c[0]	-	Putative uncharacterized protein	3.67494	Down	0.00267104
Rv0371c[0]	-	Putative uncharacterized protein	4.54058	Down	0.00501876
Rv0373c[0]	-	Carbon monoxide dehydrogenase, large subunit, putative	2.85298	Down	0.000468
Rv0375c[0]	-	PROBABLE CARBON MONOXYDE DEHYDROGENASE (MEDIUM CHAIN)	2.91714	Down	0.0125087
Rv0379[0]	secE2	POSSIBLE PROTEIN TRANSPORT PROTEIN SECE2	4.91664	Down	0.0205638
Rv0380c[0]	-	POSSIBLE RNA METHYLTRANSFERASE (RNA METHYLASE)	2.88542	Down	0.0431911
Rv0381c[0]	-	Putative uncharacterized protein	4.95405	Down	0.0198103
Rv0382c[0]	pyrE	Orotate phosphoribosyltransferase	6.89148	Down	0.00118062
Rv0384c[0]	clpB	Chaperone protein clpB	11.2264	Down	0.0450006
Rv0397[0]	-	CONSERVED 13E12 REPEAT FAMILY PROTEIN	5.20419	Down	0.00168768
Rv0402c[0]	mmpL1	Putative membrane protein mmpL1	2.80118	Down	0.0120513
Rv0413[0]	mutT3	MutT/nudix family protein	2.28879	Down	0.0142989
Rv0416[0]	thiS	POSSIBLE PROTEIN THIS	2.3492	Down	0.00602754
Rv0426c[0]	-	POSSIBLE TRANSMEMBRANE PROTEIN	2.85319	Up	0.000551
Rv0454[0]	-	Putative uncharacterized protein	2.71101	Up	0.0182027
Rv0456c[0]	echA2	ENOYL-CoA HYDRATASE ECHA2 (ENOYL HYDRASE) (UNSATURATED ACYL-CoA HYDRATASE) (CROTONASE)	4.68147	Down	8.44e-06
Rv0465c[0]	-	Uncharacterized HTH-type transcriptional regulator Rv0465c/MT0481	2.36014	Up	0.00428743
Rv0492c[0]	-	Uncharacterized GMC-type oxidoreductase Rv0492c/MT0511/MT0512	2.2457	Down	0.00774061
Rv0524[0]	hemL	Glutamate-1-semialdehyde 2,1-aminomutase	2.02148	Up	0.037387
Rv0540[0]	-	Putative uncharacterized protein	2.87903	Down	0.0452296
Rv0549c[0]	-	Putative uncharacterized protein	2.33984	Down	0.00671407
Rv0557[0]	pimB	MANNOSYLTRANSFERASE PIMB	2.04073	Down	0.000744
Rv0570[0]	nrdZ	Ribonucleoside-diphosphate reductase	2.07983	Up	0.025629
Rv0590[0]	mce2B	MCE-FAMILY PROTEIN MCE2B	2.19648	Down	0.0363269
Rv0592[0]	mce2D	MCE-FAMILY PROTEIN MCE2D	4.03685	Down	0.00355172
Rv0604[0]	lpqO	PROBABLE CONSERVED LIPOPROTEIN LPQO	2.57216	Down	0.0355014
Rv0614[0]	-	Putative uncharacterized protein	2.3176	Down	0.0344887
Rv0617[0]	-	Putative uncharacterized protein	2.56393	Down	0.00291678
Rv0622[0]	-	POSSIBLE MEMBRANE PROTEIN	2.11015	Down	0.00767515
Rv0630c[0]	recB	Exodeoxyribonuclease V beta chain	7.45636	Down	0.000266
Rv0649[0]	fabD2	POSSIBLE MALONYL COA-ACYL CARRIER PROTEIN TRANSACYLASE FABD2 (MCT)	2.6322	Down	1.59e-05
Rv0653c[0]	-	POSSIBLE TRANSCRIPTIONAL REGULATORY PROTEIN (PROBABLY TETR-FAMILY)	2.78384	Down	0.018831
Rv0654[0]	-	Dioxygenase, putative	4.36981	Down	0.00119786
Rv0656c[0]	-	Putative uncharacterized protein	2.66857	Down	0.0222384
Rv0671[0]	lpqP	Hydrolase/esterase, putative	2.2001	Down	0.0354823
Rv0672[0]	fadE8	Acyl-CoA dehydrogenase, putative	3.1621	Down	0.00544888
Rv0677c[0]	mmpS5	Putative membrane protein mmpS5	2.19638	Down	0.04397
Rv0687[0]	-	Oxidoreductase, short-chain dehydrogenase/reductase family	6.58243	Down	0.00256691
Rv0689c[0]	-	Putative uncharacterized protein	2.71417	Down	0.041613
Rv0692[0]	-	Putative uncharacterized protein	2.60797	Down	0.0255827
Rv0710[0]	rpsQ	30S ribosomal protein S17	2.62034	Up	0.0347129
Rv0715[0]	rplX	50S ribosomal protein L24	2.1606	Up	0.00660379
Rv0718[0]	rpsH	30S ribosomal protein S8	2.11208	Up	0.0157889
Rv0721[0]	rpsE	30S ribosomal protein S5	2.29163	Up	0.0259402
Rv0724[0]	sppA	POSSIBLE PROTEASE IV SPPA (ENDOPEPTIDASE IV) (SIGNAL PEPTIDE PEPTIDASE)	2.25853	Up	0.0405612
Rv0725c[0]	-	Putative uncharacterized protein	2.4842	Down	0.022271
Rv0743c[0]	-	Putative uncharacterized protein	3.07986	Down	0.00737425
Rv0749.1[0]	-	Putative uncharacterized protein	5.48619	Down	0.0354621
Rv0751c[0]	mmsB	Probable 3-hydroxyisobutyrate dehydrogenase	2.18816	Down	0.0314486
Rv0764c[0]	cyp51	Lanosterol 14-alpha demethylase	2.90931	Down	0.0129449
Rv0767c[0]	-	Uncharacterized HTH-type transcriptional regulator Rv0767c/MT0791	3.62909	Down	0.0157751
Rv0768[0]	aldA	Aldehyde dehydrogenase	2.33111	Down	0.0257365
Rv0772[0]	purD	Phosphoribosylamine--glycine ligase	2.33991	Down	5.76e-05
Rv0775[0]	-	Putative uncharacterized protein	2.70057	Down	0.00590936
Rv0779c[0]	-	POSSIBLE CONSERVED TRANSMEMBRANE PROTEIN	2.41067	Down	0.0213315
Rv0784[0]	-	Putative uncharacterized protein	5.72367	Down	0.00134737
Rv0785[0]	-	Putative uncharacterized protein	3.35799	Down	0.000917
Rv0790c[0]	-	Putative uncharacterized protein	3.55081	Down	0.0387617
Rv0828c[0]	-	POSSIBLE DEAMINASE	4.08097	Down	0.000335
Rv0840c[0]	pip	PROBABLE PROLINE IMINOPEPTIDASE PIP (PROLYL AMINOPEPTIDASE) (PAP)	10.6627	Down	0.000262
Rv0890c[0]	-	Putative HTH-type transcriptional regulator Rv0890c/MT0914	2.49058	Down	0.0176273
Rv0927c[0]	-	Oxidoreductase, short-chain dehydrogenase/reductase family	2.4166	Down	0.0271895
Rv0951[0]	sucC	Succinyl-CoA ligase [ADP-forming] subunit beta	2.00025	Up	0.0170616
Rv0962c[0]	lprP	Uncharacterized lipoprotein lprP	4.81903	Down	0.000141
Rv0966c[0]	-	Uncharacterized protein Rv0966c/MT0994	2.24392	Up	0.0272063
Rv0969[0]	ctpV	Probable cation-transporting ATPase V	4.45742	Down	0.031383
Rv0970[0]	-	Uncharacterized protein Rv0970/MT0998	5.90012	Down	0.00556746
Rv0980c[0]	PE_PGRS18	PE-PGRS FAMILY PROTEIN	13.8273	Down	1.18e-05
Rv0989c[0]	grcC2	PROBABLE POLYPRENYL-DIPHOSPHATE SYNTHASE GRCC2 (POLYPRENYL PYROPHOSPHATE SYNTHETASE)	8.91185	Down	0.000142
Rv0990c[0]	-	Putative uncharacterized protein	11.0294	Down	0.0274385
Rv0995[0]	rimJ	POSSIBLE RIBOSOMAL-PROTEIN-ALANINE ACETYLTRANSFERASE RIMJ (ACETYLATING ENZYME FOR N-TERMINAL OF RIBOSOMAL PROTEIN S5)	2.29539	Down	0.000289
Rv1011[0]	ispE	4-diphosphocytidyl-2-C-methyl-D-erythritol kinase	2.66503	Down	0.0278877
Rv1024[0]	-	POSSIBLE CONSERVED MEMBRANE PROTEIN	4.18592	Down	0.00266227
Rv1028c[0]	kdpD	Sensor protein kdpD	2.31934	Down	0.00712853
Rv1032c[0]	trcS	Sensor protein	2.04365	Down	0.016946
Rv1033c[0]	trcR	TWO COMPONENT TRANSCRIPTIONAL REGULATOR TRCR	4.15971	Down	0.01702
Rv1039c[0]	ppe15	Uncharacterized PPE family protein PPE15	3.38751	Down	0.0324175
Rv1065[0]	-	Putative uncharacterized protein	2.31726	Down	0.0139773
Rv1073[0]	-	Putative uncharacterized protein	3.63337	Down	0.0191626
Rv1146[0]	mmpL13b	PROBABLE CONSERVED TRANSMEMBRANE TRANSPORT PROTEIN MMPL13B	2.02439	Down	0.0307419
Rv1150[0]	-		3.97822	Down	0.0103167
Rv1157c[0]	-	CONSERVED HYPOTHETICAL ALA-, PRO-RICH PROTEIN	3.71852	Down	0.00329645
Rv1159.1[0]	-	Putative pterin-4-alpha-carbinolamine dehydratase	2.38288	Up	0.0244865
Rv1159[0]	-	CONSERVED TRANSMEMBRANE PROTEIN	3.98708	Down	0.00259576
Rv1223[0]	htrA	Heat shock protein HtrA	10.902	Down	0.00931555
Rv1224[0]	tatB	Sec-independent protein translocase protein tatB homolog	8.59654	Down	0.00901255
Rv1225c[0]	-	Hydrolase, haloacid dehalogenase-like family	2.24141	Down	0.00600498
Rv1227c[0]	-	PROBABLE TRANSMEMBRANE PROTEIN	3.1591	Down	0.0312339
Rv1228[0]	lpqX	PROBABLE LIPOPROTEIN LPQX	4.42619	Down	0.00150157
Rv1232c[0]	-	Putative uncharacterized protein	2.10168	Down	0.00240994
Rv1242[0]	-	Putative uncharacterized protein	2.57814	Down	0.000759
Rv1249c[0]	-	POSSIBLE MEMBRANE PROTEIN	2.18834	Up	0.0184826
Rv1257c[0]	-	Oxidoreductase, FAD-binding	2.14559	Down	0.0492486
Rv1259[0]	-	Uncharacterized protein Rv1259/MT1297.1	2.12574	Down	0.00737306
Rv1263[0]	amiB2	Putative amidase amiB2	2.20092	Down	0.000522
Rv1288[0]	-	Uncharacterized protein Rv1288/MT1326	2.01061	Down	0.0126048
Rv1297[0]	rho	Transcription termination factor rho	6.55052	Down	0.0453254
Rv1299[0]	prfA	Peptide chain release factor 1	5.0473	Down	0.0203874
Rv1300[0]	hemK	Protein hemK homolog	6.31319	Down	0.00492864
Rv1302[0]	rfe	Putative undecaprenyl-phosphate alpha-N-acetylglucosaminyl 1-phosphate transferase	3.70601	Down	0.0230856
Rv1344[0]	mbtL	Acyl carrier protein mbtL	2.17981	Down	0.0159157
Rv1357c[0]	-	Uncharacterized protein Rv1357c/MT1400	2.79426	Down	0.0126812
Rv1375[0]	-	UPF0142 protein Rv1375/MT1419	2.82163	Up	0.0407789
Rv1388[0]	mihF	PUTATIVE INTEGRATION HOST FACTOR MIHF	2.38403	Up	0.0214043
Rv1395[0]	-	Uncharacterized HTH-type transcriptional regulator Rv1395/MT1440	3.42938	Down	0.000118
Rv1402[0]	priA	Putative primosomal protein N'	2.43506	Down	0.0448903
Rv1413[0]	-	Uncharacterized protein Rv1413/MT1456.1	5.48635	Down	0.000278
Rv1414[0]	-	Uncharacterized protein Rv1414/MT1457	2.98105	Down	0.000258
Rv1432[0]	-	P49 protein	2.21825	Down	0.000685
Rv1457c[0]	-	ABC-type efflux system, permease protein	6.984	Down	0.000201
Rv1472[0]	echA12	Probable enoyl-CoA hydratase echA12	3.75965	Down	0.000614
Rv1473[0]	-	ABC transporter, ATP-binding protein	4.66637	Down	2.15e-05
Rv1478[0]	-	HYPOTHETICAL INVASION PROTEIN	2.03854	Down	0.0389823
Rv1494[0]	-	Uncharacterized protein Rv1494/MT1541	2.54782	Up	0.00143229
Rv1591[0]	-	Uncharacterized protein Rv1591/MT1626	2.17529	Down	0.0201256
Rv1593c[0]	-	Putative uncharacterized protein	3.21138	Down	0.0487331
Rv1622c[0]	cydB	Cytochrome d ubiquinol oxidase, subunit II	2.62068	Down	0.0457026
Rv1627c[0]	-	Nonspecific lipid-transfer protein	2.28534	Up	0.00714835
Rv1633[0]	uvrB	UvrABC system protein B	5.08761	Down	0.000734
Rv1641[0]	infC	Translation initiation factor IF-3	2.36976	Up	0.0115915
Rv1673c[0]	-	Putative uncharacterized protein	2.47312	Down	0.0299316
Rv1686c[0]	-	Antibiotic resistance ABC transporter, efflux protein	3.43167	Down	6.44e-06
Rv1696[0]	recN	DNA repair protein recN	2.69092	Down	0.00437783
Rv1707[0]	-	PROBABLE CONSERVED TRANSMEMBRANE PROTEIN	3.14064	Down	0.00439316
Rv1715[0]	fadB3	3-hydroxyacyl-CoA dehydrogenase family protein	5.07	Down	0.000304
Rv1782[0]	-	PROBABLE CONSERVED MEMBRANE PROTEIN	3.37255	Down	0.0221981
Rv1787[0]	ppe25	Uncharacterized PPE family protein PPE25	7.08197	Down	0.00206289
Rv1800[0]	ppe28	Uncharacterized PPE family protein PPE28	2.36877	Down	0.00151047
Rv1802[0]	ppe30	Uncharacterized PPE family protein PPE30	5.64426	Down	0.00365264
Rv1806[0]	PE20	PE FAMILY PROTEIN	4.03811	Down	0.0467428
Rv1807[0]	PPE31	PPE FAMILY PROTEIN	4.18985	Down	0.0491282
Rv1808[0]	ppe32	Uncharacterized PPE family protein PPE32	9.32377	Down	0.00104282
Rv1809[0]	ppe33	Uncharacterized PPE family protein PPE33	4.44411	Down	0.00511314
Rv1811[0]	mgtC	Mg2+ transport protein	3.96786	Down	0.00270942
Rv1875[0]	-	Putative uncharacterized protein	4.93216	Down	0.0178551
Rv1876[0]	bfr	Bacterioferritin	3.89719	Down	0.023818
Rv1881c[0]	lppE	POSSIBLE CONSERVED LIPOPROTEIN LPPE	2.13208	Down	0.00928786
Rv1884c[0]	rpfC	PROBABLE RESUSCITATION-PROMOTING FACTOR RPFC	3.0083	Up	0.0265367
Rv1885c[0]	-	Chorismate mutase-related protein	2.37445	Down	0.0336445
Rv1909c[0]	fur	Ferric uptake regulation protein	2.30167	Up	0.0465208
Rv1935c[0]	echA13	Enoyl-CoA hydratase/isomerase family protein	3.08673	Down	0.000143
Rv1952[0]	-	Putative uncharacterized protein	3.05486	Down	0.0068809
Rv1956[0]	-	DNA-binding protein, putative	3.60032	Down	0.0011113
Rv1958c[0]	-	Putative uncharacterized protein	3.02172	Down	0.035467
Rv1961[0]	-	Putative uncharacterized protein	3.52652	Down	0.0102728
Rv1969[0]	mce3D	MCE-FAMILY PROTEIN MCE3D	3.60742	Down	0.00266596
Rv1974[0]	-	PROBABLE CONSERVED MEMBRANE PROTEIN	3.64512	Down	0.0255703
Rv1975[0]	-	Putative uncharacterized protein	4.01739	Down	0.000961
Rv1985c[0]	-	Uncharacterized HTH-type transcriptional regulator Rv1985c/MT2039	3.23672	Down	6.26e-05
Rv1989c[0]	-	Uncharacterized protein Rv1989c/MT2043	3.26969	Down	0.0470925
Rv1991c[0]	-	Uncharacterized protein Rv1991c/MT2046	5.58713	Down	0.000586
Rv1992c[0]	ctpG	Probable cation-transporting ATPase G	6.36459	Down	0.000755
Rv1993c[0]	-	Uncharacterized protein Rv1993c/MT2049	4.25695	Down	0.0261269
Rv1994c[0]	cmtR	HTH-type transcriptional regulator cmtR	6.23477	Down	0.0266044
Rv1997[0]	ctpF	Probable cation-transporting ATPase F	3.36256	Up	0.000292
Rv2020c[0]	-	Putative uncharacterized protein	4.67325	Down	0.000213
Rv2025c[0]	-	Cation efflux system protein	7.09049	Down	0.00157307
Rv2028c[0]	-	Putative uncharacterized protein	3.41602	Up	0.00404704
Rv2029c[0]	pfkB	Carbohydrate kinase, PfkB family	3.62171	Up	0.0372539
Rv2032[0]	acg	Putative uncharacterized protein acg	2.8766	Up	0.0167822
Rv2034[0]	-	Probable ArsR-type repressor protein	2.03502	Down	0.00441959
Rv2036[0]	-	Putative uncharacterized protein	4.32649	Down	0.00729178
Rv2051c[0]	ppm1	Polyprenol-monophosphomannose synthase Ppm1	2.73781	Down	0.0197899
Rv2052c[0]	-	Putative uncharacterized protein	4.11619	Down	0.0300585
Rv2066[0]	cobIJ	Cobalamin biosynthesis protein cobIJ	2.85052	Down	0.0269117
Rv2072c[0]	cobL	Precorrin-6Y C(5,15)-methyltransferase [decarboxylating]	2.09863	Down	0.00790927
Rv2077c[0]	-	Uncharacterized protein Rv2077c/MT2137	4.41014	Up	0.0356158
Rv2080[0]	lppJ	Putative lipoprotein lppJ	2.01501	Down	0.0407677
Rv2082[0]	-	Uncharacterized protein Rv2082	6.65342	Down	0.000127
Rv2102[0]	-	Putative uncharacterized protein	2.04498	Down	0.025245
Rv2103c[0]	-	Putative uncharacterized protein	2.61391	Down	0.0187531
Rv2139[0]	pyrD	Dihydroorotate dehydrogenase	2.45972	Down	0.0273507
Rv2149c[0]	-	UPF0124 protein Rv2149c/MT2208	3.00093	Down	0.0148866
Rv2160c[0]	-	Putative uncharacterized protein	2.35261	Up	0.0483654
Rv2177c[0]	-	IS1558', transposase	4.41498	Down	0.00253819
Rv2180c[0]	-	Probable conserved integral membrane protein	2.26102	Down	0.0351037
Rv2181[0]	-	Putative uncharacterized protein	2.36319	Down	0.0488507
Rv2191[0]	-	Uncharacterized protein Rv2191/MT2247	4.18773	Down	0.000824
Rv2202c[0]	adoK	Adenosine kinase	2.31363	Down	0.0245735
Rv2203[0]	-	Uncharacterized protein Rv2203/MT2259	3.12239	Down	0.0286374
Rv2224c[0]	-	Uncharacterized protein Rv2224c/MT2282	2.44791	Up	0.0379435
Rv2230c[0]	-	UPF0135 protein Rv2230c/MT2289	3.62236	Down	0.00548633
Rv2250.1[0]	-	POSSIBLE FLAVOPROTEIN	2.35165	Down	0.00375645
Rv2252[0]	dagK	Diacylglycerol kinase	2.84108	Down	0.00382733
Rv2254c[0]	-	Probable integral membrane protein	2.31365	Down	0.00152844
Rv2256c[0]	-	Putative uncharacterized protein	2.74124	Down	0.0316992
Rv2264c[0]	-	Conserved hypothetical proline rich protein	4.62971	Down	6.71e-06
Rv2296[0]	dhmA1	Haloalkane dehalogenase 1	3.16279	Down	0.00457237
Rv2305[0]	-	Uncharacterized protein Rv2305/MT2362	3.71436	Down	0.000325
Rv2322c[0]	rocD1	PROBABLE ORNITHINE AMINOTRANSFERASE (N-terminus part) ROCD1 (ORNITHINE--OXO-ACID AMINOTRANSFERASE)	2.0765	Up	0.00738862
Rv2363[0]	amiA2	Putative amidase amiA2	2.65903	Down	0.00686785
Rv2375[0]	-	Putative uncharacterized protein	2.23901	Up	0.0286201
Rv2389c[0]	rpfD	PROBABLE RESUSCITATION-PROMOTING FACTOR RPFD	2.0536	Down	0.0489175
Rv2390c[0]	-	Putative uncharacterized protein	3.67155	Down	0.00121082
Rv2400c[0]	subI	PROBABLE SULFATE-BINDING LIPOPROTEIN SUBI	2.27837	Down	0.0138284
Rv2449c[0]	-	Putative uncharacterized protein	3.10727	Down	0.0432436
Rv2453c[0]	mobA	Probable molybdopterin-guanine dinucleotide biosynthesis protein A	2.55191	Down	0.0182903
Rv2464c[0]	-	Putative DNA glycosylase Rv2464c/MT2539	8.97942	Down	0.000851
Rv2465c[0]	rpiB	Ribose-5-phosphate isomerase B	7.37727	Down	0.0230603
Rv2466c[0]	-	Putative uncharacterized protein	3.24685	Down	0.0423228
Rv2488c[0]	-	PROBABLE TRANSCRIPTIONAL REGULATORY PROTEIN (LUXR-FAMILY)	2.95925	Down	0.00210679
Rv2500c[0]	fadE19	Acyl-CoA dehydrogenase	3.46941	Down	0.0103424
Rv2502c[0]	accD1	PROBABLE ACETYL-/PROPIONYL-CoA CARBOXYLASE (BETA SUBUNIT) ACCD1	3.52527	Down	0.0147419
Rv2503c[0]	scoB	Probable succinyl-CoA:3-ketoacid-coenzyme A transferase subunit B	5.60802	Down	0.00117429
Rv2504c[0]	scoA	Probable succinyl-CoA:3-ketoacid-coenzyme A transferase subunit A	9.27734	Down	0.000163
Rv2514c[0]	-	Putative uncharacterized protein	4.43161	Down	0.0462002
Rv2541[0]	-	HYPOTHETICAL ALANINE RICH PROTEIN	2.65572	Down	0.00486824
Rv2546[0]	-	Putative uncharacterized protein	3.22157	Down	0.00897546
Rv2551c[0]	-	Putative uncharacterized protein	4.04805	Down	0.00684389
Rv2553c[0]	-	Putative uncharacterized protein	4.8533	Down	0.0107541
Rv2554c[0]	-	Putative Holliday junction resolvase	3.47812	Down	0.0381108
Rv2555c[0]	alaS	Alanyl-tRNA synthetase	10.203	Down	0.00118611
Rv2557[0]	-	Uncharacterized protein Rv2557/MT2634	2.4239	Up	0.0103619
Rv2559c[0]	-	Uncharacterized AAA domain-containing protein Rv2559c/MT2636	2.8019	Down	0.00224165
Rv2568c[0]	-	Uncharacterized protein Rv2568c/MT2644	3.55461	Down	0.0176882
Rv2573[0]	-	Putative 2-dehydropantoate 2-reductase	2.8938	Down	0.00374329
Rv2581c[0]	-	Uncharacterized protein Rv2581c/MT2658	2.13896	Up	0.00520862
Rv2598[0]	-	Uncharacterized protein Rv2598/MT2673.1	2.25164	Down	0.00166823
Rv2602[0]	-	Putative uncharacterized protein	3.642	Down	0.00938517
Rv2612c[0]	pgsA1	CDP-diacylglycerol--glycerol-3-phosphate 3-phosphatidyltransferase, putative	2.90456	Down	0.00495939
Rv2614c[0]	thrS	Threonyl-tRNA synthetase	6.91906	Down	0.000351
Rv2615c[0]	PE_PGRS45	PE-PGRS FAMILY PROTEIN	9.818	Down	0.000435
Rv2617c[0]	-	PROBABLE TRANSMEMBRANE PROTEIN	9.72117	Down	0.0255484
Rv2619c[0]	-	Putative uncharacterized protein	3.21716	Down	0.0139934
Rv2634c[0]	PE_PGRS46	Uncharacterized PE-PGRS family protein PE_PGRS46	2.01233	Down	0.0399183
Rv2639c[0]	-	UPF0060 membrane protein Rv2639c/MT2717	3.01243	Down	0.0156914
Rv2642[0]	-	POSSIBLE TRANSCRIPTIONAL REGULATORY PROTEIN (PROBABLY ARSR-FAMILY)	7.18261	Down	0.0385227
Rv2656c[0]	-	Uncharacterized protein Rv2656c/MT2733	2.23611	Down	0.00608707
Rv2662[0]	-	Putative uncharacterized protein	6.74681	Down	0.0206738
Rv2707[0]	-	PROBABLE CONSERVED TRANSMEMBRANE ALANINE AND LEUCINE RICH PROTEIN	4.46685	Down	0.0283615
Rv2709[0]	-	PROBABLE CONSERVED TRANSMEMBRANE PROTEIN	3.87769	Down	0.00427668
Rv2712c[0]	-	Putative uncharacterized protein	2.84054	Down	0.00317513
Rv2713[0]	sthA	Probable soluble pyridine nucleotide transhydrogenase	3.05383	Down	0.00414963
Rv2717c[0]	-	UPF0678 fatty acid-binding protein-like protein Rv2717c/MT2790	2.63723	Down	0.0039729
Rv2737.1[0]	-	CONSERVED HYPOTHETICAL CYSTEINE RICH PROTEIN	2.21209	Down	0.0340475
Rv2737c[0]	recA	Protein recA	5.62463	Down	7.16e-06
Rv2739c[0]	-	POSSIBLE ALANINE RICH TRANSFERASE	2.8587	Down	0.00446518
Rv2741[0]	PE_PGRS47	PE-PGRS FAMILY PROTEIN	4.03801	Up	0.0457954
Rv2742c[0]	-	CONSERVED HYPOTHETICAL ARGININE RICH PROTEIN	3.91651	Down	0.0192293
Rv2743c[0]	-	POSSIBLE CONSERVED TRANSMEMBRANE ALANINE RICH PROTEIN	3.71236	Down	0.00254335
Rv2744c[0]	-	35 kDa protein	3.11796	Down	0.0490852
Rv2750[0]	-	Oxidoreductase, short-chain dehydrogenase/reductase family	2.3958	Down	0.0204972
Rv2770c[0]	ppe44	Uncharacterized PPE family protein PPE44	2.5198	Down	0.00708028
Rv2788[0]	sirR	Iron repressor protein	2.37621	Up	0.0165638
Rv2794c[0]	-	Putative uncharacterized protein	3.0335	Down	0.0282114
Rv2826c[0]	-	Putative uncharacterized protein	2.70839	Down	0.0267646
Rv2827c[0]	-	Putative uncharacterized protein	5.91202	Down	0.0290217
Rv2832c[0]	ugpC	PROBABLE Sn-GLYCEROL-3-PHOSPHATE TRANSPORT ATP-BINDING PROTEIN ABC TRANSPORTER UGPC	2.6321	Down	0.0229217
Rv2836c[0]	dinF	POSSIBLE DNA-DAMAGE-INDUCIBLE PROTEIN F DINF	2.6167	Down	0.00051
Rv2837c[0]	-	Putative uncharacterized protein	2.85732	Down	0.036789
Rv2838c[0]	rbfA	Ribosome-binding factor A	3.47064	Down	0.0108155
Rv2843[0]	-	PROBABLE CONSERVED TRANSMEMBRANE ALANINE RICH PROTEIN	2.08398	Down	0.018558
Rv2844[0]	-	CONSERVED HYPOTHETICAL ALANINE RICH PROTEIN	2.41663	Down	0.0425572
Rv2904c[0]	rplS	50S ribosomal protein L19	2.10157	Up	0.0382038
Rv2923c[0]	-	Uncharacterized protein Rv2923c/MT2992	3.25855	Down	0.0188637
Rv2925c[0]	rnc	Ribonuclease 3	2.98173	Up	0.0105905
Rv2934[0]	ppsD	PHENOLPTHIOCEROL SYNTHESIS TYPE-I POLYKETIDE SYNTHASE PPSD	7.14698	Down	0.000223
Rv2937[0]	drrB	Antibiotic resistance ABC transporter, efflux protein	3.11981	Down	0.00257514
Rv2980[0]	-	POSSIBLE CONSERVED SECRETED PROTEIN	2.14572	Down	0.00939928
Rv2983[0]	-	CONSERVED HYPOTHETICAL ALANINE RICH PROTEIN	2.2992	Down	0.0115072
Rv3011c[0]	gatA	Glutamyl-tRNA(Gln) amidotransferase subunit A	2.43257	Down	0.00665598
Rv3014c[0]	ligA	DNA ligase	11.8674	Down	1.77e-05
Rv3027c[0]	-	Putative uncharacterized protein	2.80498	Down	0.000932
Rv3029c[0]	etfB	Electron transfer flavoprotein subunit beta	3.41656	Up	0.0253828
Rv3042c[0]	serB2	PROBABLE PHOSPHOSERINE PHOSPHATASE SERB2 (PSP) (O-PHOSPHOSERINE PHOSPHOHYDROLASE) (PSPASE)	3.12071	Down	0.0460154
Rv3045[0]	adhC	NADP-dependent alcohol dehydrogenase C	2.2977	Down	0.0255643
Rv3049c[0]	-	Monooxygenase, flavin-binding family	2.52006	Down	0.0327037
Rv3052c[0]	nrdI	Protein nrdI	2.74499	Down	0.0182086
Rv3054c[0]	-	Putative uncharacterized protein	12.8172	Down	0.0246032
Rv3060c[0]	-	PROBABLE TRANSCRIPTIONAL REGULATORY PROTEIN (PROBABLY GNTR-FAMILY)	2.58568	Up	0.0197071
Rv3072c[0]	-	Putative uncharacterized protein	2.26068	Down	0.00607668
Rv3074[0]	-	Putative uncharacterized protein	3.45171	Up	0.0376716
Rv3081[0]	-	Putative uncharacterized protein	2.23605	Down	0.00427307
Rv3093c[0]	-	HYPOTHETICAL OXIDOREDUCTASE	2.39263	Down	0.00540953
Rv3095[0]	-	Uncharacterized HTH-type transcriptional regulator Rv3095/MT3179	2.82915	Down	0.0413375
Rv3096[0]	-	Putative uncharacterized protein	2.63124	Down	0.00255181
Rv3097c[0]	PE_PGRS63	PE-PGRS FAMILY PROTEIN, PROBABLY TRIACYLGLYCEROL LIPASE (ESTERASE/LIPASE) (TRIGLYCERIDE LIPASE) (TRIBUTYRASE)	8.5457	Down	0.000828
Rv3098c[0]	-	Putative uncharacterized protein	8.31567	Down	8.07e-05
Rv3099c[0]	-	Putative uncharacterized protein	4.4327	Up	0.0194267
Rv3103c[0]	-	HYPOTHETICAL PROLINE-RICH PROTEIN	2.43369	Down	0.0092123
Rv3108[0]	-	Putative uncharacterized protein	3.11751	Down	0.000292
Rv3115[0]	-	PROBABLE TRANSPOSASE	6.06862	Down	0.00498448
Rv3120[0]	-	Putative uncharacterized protein	2.86521	Down	0.00615473
Rv3126c[0]	-	Putative uncharacterized protein	2.52957	Up	0.0418627
Rv3160c[0]	-	POSSIBLE TRANSCRIPTIONAL REGULATORY PROTEIN (PROBABLY TETR-FAMILY)	3.80135	Down	0.0131027
Rv3172c[0]	-	Putative uncharacterized protein	4.14961	Down	0.00125486
Rv3175[0]	-	POSSIBLE AMIDASE (AMINOHYDROLASE)	3.27657	Down	0.0325754
Rv3176c[0]	mesT	PROBABLE EPOXIDE HYDROLASE MEST (EPOXIDE HYDRATASE) (ARENE-OXIDE HYDRATASE)	6.50945	Down	0.000613
Rv3177[0]	-	POSSIBLE PEROXIDASE (NON-HAEM PEROXIDASE)	5.19456	Down	0.00015
Rv3180c[0]	-	HYPOTHETICAL ALANINE RICH PROTEIN	2.59751	Down	0.0361419
Rv3188[0]	-	Putative uncharacterized protein	3.42138	Down	0.00829432
Rv3189[0]	-	Putative uncharacterized protein	3.23765	Down	0.0083896
Rv3200c[0]	-	POSSIBLE TRANSMEMBRANE CATION TRANSPORTER	2.23002	Down	0.033067
Rv3202c[0]	-	Helicase, UvrD/Rep family	5.39548	Down	0.000406
Rv3205c[0]	-	Putative uncharacterized protein	12.1952	Down	3.56e-05
Rv3206c[0]	moeB1	HesA/MoeB/ThiF family protein	8.52177	Down	0.0350881
Rv3220c[0]	pdtaS	Probable sensor histidine kinase pdtaS	5.31943	Down	0.0129232
Rv3220c[0]	pdtaS	Probable sensor histidine kinase pdtaS	7.63006	Down	0.000158
Rv3221c[0]	-	Biotinylated protein TB7.3	6.01233	Down	0.000782
Rv3222c[0]	-	Putative uncharacterized protein	7.75665	Down	0.0217413
Rv3223c[0]	rpoE	RNA polymerase sigma-E factor	6.07466	Down	0.0125451
Rv3226c[0]	-	Putative uncharacterized protein	2.68104	Down	0.00813504
Rv3279c[0]	birA	BirA bifunctional protein	2.13332	Down	0.0344205
Rv3286c[0]	sigF	ALTERNATE RNA POLYMERASE SIGMA FACTOR SIGF	2.34127	Down	0.000766
Rv3332[0]	nagA	PROBABLE N-ACETYLGLUCOSAMINE-6-PHOSPHATE DEACETYLASE NAGA (GLCNAC 6-P DEACETYLASE)	3.74744	Down	0.00128926
Rv3372[0]	otsB	Trehalose-phosphate phosphatase	2.90837	Down	0.00521529
Rv3394c[0]	-	Putative uncharacterized protein	3.47924	Down	0.0147372
Rv3405c[0]	-	Uncharacterized HTH-type transcriptional regulator Rv3405c/MT3513	2.6377	Down	0.0115051
Rv3407[0]	-	Uncharacterized protein Rv3407/MT3515	8.3073	Up	0.00120203
Rv3424c[0]	-	Uncharacterized protein Rv3424c/MT3532.2	7.05542	Down	0.001952
Rv3435c[0]	-	PROBABLE CONSERVED TRANSMEMBRANE PROTEIN	2.18918	Down	0.00314766
Rv3457c[0]	rpoA	DNA-directed RNA polymerase subunit alpha	2.22735	Up	0.0386809
Rv3463[0]	-	Putative uncharacterized protein	2.01569	Down	0.0160929
Rv3467[0]	-	Putative uncharacterized protein	7.99571	Down	0.00784815
Rv3474[0]	-	Insertion element IS6110 uncharacterized 12.0 kDa protein	6.93168	Down	0.0365915
Rv3475[0]	-	Putative transposase for insertion sequence element IS986/IS6110	8.4766	Down	0.00017
Rv3482c[0]	-	Putative uncharacterized protein	2.97945	Down	0.0366499
Rv3490[0]	otsA	Trehalose-phosphate synthase	4.49313	Down	0.0497005
Rv3493c[0]	-	CONSERVED HYPOTHETICAL MCE ASSOCIATED ALANINE AND VALINE RICH PROTEIN	2.99771	Down	0.000597
Rv3502c[0]	-	PROBABLE SHORT-CHAIN TYPE DEHYDROGENASE/REDUCTASE	2.61154	Down	0.0366688
Rv3514[0]	PE_PGRS57	PE-PGRS FAMILY PROTEIN	2.94205	Down	0.00238071
Rv3515c[0]	fadD19	PROBABLE FATTY-ACID-CoA LIGASE FADD19 (FATTY-ACID-CoA SYNTHETASE) (FATTY-ACID-CoA SYNTHASE)	3.26448	Down	0.00188721
Rv3532[0]	ppe61	Uncharacterized PPE family protein PPE61	2.88584	Down	0.0475138
Rv3537[0]	-	PROBABLE DEHYDROGENASE	2.98533	Down	0.00803361
Rv3561[0]	fadD3	PROBABLE FATTY-ACID-CoA LIGASE FADD3 (FATTY-ACID-CoA SYNTHETASE) (FATTY-ACID-CoA SYNTHASE)	2.30273	Down	0.00739868
Rv3566c[0]	nat	Arylamine N-acetyltransferase	2.04117	Down	0.0340896
Rv3570c[0]	-	Hydroxylase, putative	2.18603	Down	0.0455042
Rv3577[0]	-	Putative uncharacterized protein	4.61905	Down	0.0286179
Rv3611[0]	-	HYPOTHETICAL ARGININE AND PROLINE RICH PROTEIN	5.13766	Down	0.0184072
Rv3618[0]	-	Luciferase-related protein	2.47782	Down	0.0261457
Rv3622c[0]	PE32	PE FAMILY PROTEIN	2.06177	Down	0.00429449
Rv3623[0]	lpqG	Lipoprotein, putative	2.38119	Down	0.00956762
Rv3641c[0]	fic	Cell filamentation protein, putative	2.75468	Down	0.0203922
Rv3662c[0]	-	Putative uncharacterized protein	3.20736	Down	0.00969719
Rv3676[0]	-	PROBABLE TRANSCRIPTIONAL REGULATORY PROTEIN (PROBABLY CRP/FNR-FAMILY)	3.55947	Down	0.0273978
Rv3699[0]	-	Putative uncharacterized protein	2.12074	Up	0.023043
Rv3705.1[0]	-	CONSERVED HYPOTHETICAL PROLINE RICH PROTEIN	2.88931	Down	0.00610426
Rv3705c[0]	-	Putative uncharacterized protein	3.23969	Down	0.0306613
Rv3712[0]	-	Mur ligase family protein	2.22267	Down	0.0167279
Rv3715c[0]	recR	Recombination protein recR	2.34526	Down	0.00514432
Rv3717[0]	-	N-acetymuramyl-L-alanine amidase-related protein	2.0083	Down	0.0178308
Rv3744[0]	-	TRANSCRIPTIONAL REGULATORY PROTEIN (PROBABLY ARSR-FAMILY)	2.07164	Down	0.0463783
Rv3754[0]	tyrA	PREPHENATE DEHYDROGENASE TYRA (PDH) (HYDROXYPHENYLPYRUVATE SYNTHASE)	3.06357	Down	0.0381922
Rv3760[0]	-	POSSIBLE CONSERVED MEMBRANE PROTEIN	2.95247	Down	0.0189018
Rv3780[0]	-	Uncharacterized protein Rv3780/MT3889	2.80192	Down	0.012598
Rv3787c[0]	-	Putative S-adenosyl-L-methionine-dependent methyltransferase Rv3787c/MT3895	3.79599	Down	0.00146169
Rv3793[0]	embC	Probable arabinosyltransferase C	3.38616	Down	6.04e-06
Rv3821[0]	-	PROBABLE CONSERVED INTEGRAL MEMBRANE PROTEIN	2.37535	Down	0.015757
Rv3834c[0]	serS	Seryl-tRNA synthetase	2.10382	Down	0.000256
Rv3835[0]	-	PROBABLE CONSERVED MEMBRANE PROTEIN	3.11973	Down	0.0301752
Rv3836[0]	-	Putative uncharacterized protein	2.7474	Down	0.0373977
Rv3838c[0]	pheA	Prephenate dehydratase	5.45461	Down	0.00859481
Rv3839[0]	-	Putative uncharacterized protein	3.06884	Down	0.0360203
Rv3844[0]	-	IS1608', transposase	2.82526	Down	0.000119
Rv3848[0]	-	PROBABLE CONSERVED TRANSMEMBRANE PROTEIN	3.11402	Down	0.0428711
Rv3870[0]	-	FtsK/SpoIIIE family protein	2.93312	Up	0.0114011
Rv3881c[0]	mtb48	Antigen MTB48	2.18684	Up	0.0148964
Rv3890c[0]	-	Putative ESAT-6-like protein 11	2.46021	Up	0.0029215
Rv3920c[0]	-	Putative uncharacterized protein	2.05488	Up	0.0339227
Rv3923c[0]	rnpA	Ribonuclease P protein component	2.15082	Up	0.00963601
TBFG_11839[0]	TBFG_11839, TBFG_01803	PPE family protein	10.3708	Down	0.000598
TBFG_11923[0]	TBFG_11923	hypothetical protein	2.85623	Down	0.0461078
TBFG_11993[0]	TBFG_11993	hypothetical protein	4.68518	Down	0.0117689
TBFG_12261[0]	TBFG_12261	hypothetical protein	3.12655	Down	0.00134595
TBFG_13130[3]	TBFG_13130, TBFG_03093	pseudo	4.58447	Down	0.0258104
TBFG_13135[0]	TBFG_13135, TBFG_03097	transposase	6.17553	Down	0.00411611
TBMG_00064[0]	TBMG_00064	antitoxin	5.61855	Down	0.00895577
TBMG_00625[0]	TBMG_00625	antitoxin	2.68664	Down	0.0445879
TBMG_00681[0]	TBMG_00681	hypothetical protein	3.26005	Down	0.0325932
TBMG_01356[0]	TBMG_01356	PE-PGRS family protein	10.3713	Down	0.000666
TBMG_01918[0]	TBMG_01918	toxin	2.22913	Down	0.0266255
TBMG_01995[0]	TBMG_01995	antitoxin	2.62086	Down	0.0132758
TBMG_03894[0]	TBMG_03894	hypothetical protein	3.50723	Down	0.000951
TBMG_04068[0]	TBMG_04068	hypothetical protein	2.63934	Down	5.17e-05
		* Fold Change is defined as the ratio of normalized signal intensites of drug susceptible clinical Mtb and H37Rv

## Sheet: DS CAS vs H37RV
Differentially expressed genes of drug susceptible CAS clinical isolates of Mtb as compared to H37Rv
Gene Accession Number	GeneSymbol	Description	*Fold Change	Regulation	p-value
JTY_0082[0]	JTY_0082	hypothetical protein	3.18365	Down	0.012047
JTY_0119[0]	JTY_0119	putative sugar kinase	2.66594	Down	0.0107059
MT2589[0]	MT2589	Putative uncharacterized protein	2.77851	Down	0.00474883
Rv0005[0]	gyrB	DNA gyrase subunit B	11.3597	Down	0.00942873
Rv0028[0]	-	Uncharacterized protein Rv0028/MT0030.1	9.12437	Down	0.0366967
Rv0092[0]	ctpA	Cation-transporting P-type ATPase A	3.54858	Down	0.0105815
Rv0142[0]	-	Putative uncharacterized protein	5.99512	Down	0.045668
Rv0143c[0]	-	PROBABLE CONSERVED TRANSMEMBRANE PROTEIN	4.70268	Down	0.0386485
Rv0161[0]	-	POSSIBLE OXIDOREDUCTASE	3.29008	Down	0.011353
Rv0169[0]	mce1A	MCE-FAMILY PROTEIN MCE1A	2.56572	Down	0.0290815
Rv0203[0]	-	POSSIBLE EXPORTED PROTEIN	8.53361	Down	0.0386297
Rv0312[0]	-	CONSERVED HYPOTHETICAL PROLINE AND THREONINE RICH PROTEIN	2.12022	Down	0.00123905
Rv0354c[0]	PPE7	PPE FAMILY PROTEIN	2.49032	Down	0.0203517
Rv0440[0]	groL2	60 kDa chaperonin 2	5.07845	Down	0.0299774
Rv0456c[0]	echA2	ENOYL-CoA HYDRATASE ECHA2 (ENOYL HYDRASE) (UNSATURATED ACYL-CoA HYDRATASE) (CROTONASE)	2.09808	Down	0.0108988
Rv0475[0]	hbhA	Heparin-binding hemagglutinin	4.5806	Down	0.0125472
Rv0587[0]	yrbE2A	CONSERVED HYPOTHETICAL INTEGRAL MEMBRANE PROTEIN YRBE2A	2.736	Down	0.0133096
Rv0588[0]	yrbE2B	CONSERVED HYPOTHETICAL INTEGRAL MEMBRANE PROTEIN YRBE2B	5.11255	Down	0.00857062
Rv0608[0]	-	Putative uncharacterized protein	2.01935	Down	0.00319088
Rv0630c[0]	recB	Exodeoxyribonuclease V beta chain	8.31511	Down	0.00532835
Rv0653c[0]	-	POSSIBLE TRANSCRIPTIONAL REGULATORY PROTEIN (PROBABLY TETR-FAMILY)	3.24259	Down	0.0130904
Rv0656c[0]	-	Putative uncharacterized protein	2.4975	Down	0.00696607
Rv0700[0]	rpsJ	30S ribosomal protein S10	2.7874	Down	0.0109018
Rv0709[0]	rpmC	50S ribosomal protein L29	5.28571	Down	0.0196539
Rv0716[0]	rplE	50S ribosomal protein L5	3.63925	Down	0.000885
Rv0826[0]	-	Putative uncharacterized protein	2.47598	Down	0.017468
Rv0858c[0]	-	Aminotransferase, class I	2.41957	Down	0.0254291
Rv0947c[0]	-		2.99516	Down	0.0115306
Rv0980c[0]	PE_PGRS18	PE-PGRS FAMILY PROTEIN	2.56264	Down	0.0192567
Rv0989c[0]	grcC2	PROBABLE POLYPRENYL-DIPHOSPHATE SYNTHASE GRCC2 (POLYPRENYL PYROPHOSPHATE SYNTHETASE)	2.73957	Down	0.000175
Rv0990c[0]	-	Putative uncharacterized protein	9.58785	Down	0.0378663
Rv1039c[0]	ppe15	Uncharacterized PPE family protein PPE15	2.12281	Down	0.0172676
Rv1057[0]	-	Putative uncharacterized protein	2.99709	Down	0.0363449
Rv1065[0]	-	Putative uncharacterized protein	2.77178	Down	0.031721
Rv1073[0]	-	Putative uncharacterized protein	3.3905	Down	0.0267858
Rv1080c[0]	greA	Transcription elongation factor greA	2.99438	Down	0.00307334
Rv1138c[0]	-	POSSIBLE OXIDOREDUCTASE	2.77132	Down	0.0431433
Rv1143[0]	mcr	PROBABLE ALPHA-METHYLACYL-CoA RACEMASE MCR (2-methylacyl-CoA racemase) (2-arylpropionyl-CoA epimerase )	2.15734	Down	0.00213417
Rv1157c[0]	-	CONSERVED HYPOTHETICAL ALA-, PRO-RICH PROTEIN	2.58624	Down	0.00373906
Rv1172c[0]	PE12	PE FAMILY PROTEIN	5.40257	Down	0.0313892
Rv1178[0]	-	PROBABLE AMINOTRANSFERASE	5.12207	Down	0.00591317
Rv1228[0]	lpqX	PROBABLE LIPOPROTEIN LPQX	2.543	Down	0.00784629
Rv1235[0]	lpqY	PROBABLE SUGAR-BINDING LIPOPROTEIN LPQY	2.02194	Down	0.0139122
Rv1242[0]	-	Putative uncharacterized protein	2.22887	Down	0.00898051
Rv1280c[0]	-	Uncharacterized protein Rv1280c/MT1317	2.83894	Down	0.0425575
Rv1297[0]	rho	Transcription termination factor rho	7.23196	Down	0.0112687
Rv1392[0]	metK	S-adenosylmethionine synthetase	2.81166	Down	0.0355583
Rv1431[0]	-	CONSERVED MEMBRANE PROTEIN	3.18645	Down	0.0353003
Rv1458c[0]	-	ABC-type efflux protein, ATP-binding protein	6.69065	Down	3.13e-05
Rv1459c[0]	-	POSSIBLE CONSERVED INTEGRAL MEMBRANE PROTEIN	2.47354	Down	0.0291787
Rv1464[0]	csd	Probable cysteine desulfurase	2.93407	Down	0.0270694
Rv1466[0]	-	Putative uncharacterized protein	4.26635	Down	0.0148971
Rv1467c[0]	fadE15	Acyl-CoA dehydrogenase, putative	2.60065	Down	0.00138685
Rv1473[0]	-	ABC transporter, ATP-binding protein	3.16823	Down	0.00514113
Rv1532c[0]	-	Putative uncharacterized protein	4.34223	Down	0.00261134
Rv1565c[0]	-	CONSERVED HYPOTHETICAL MEMBRANE PROTEIN	2.16889	Down	0.0412673
Rv1570[0]	bioD	Dethiobiotin synthetase	2.89831	Down	0.0129686
Rv1591[0]	-	Uncharacterized protein Rv1591/MT1626	2.05316	Down	0.0398052
Rv1600[0]	hisC	Histidinol-phosphate aminotransferase	2.63574	Down	0.0177854
Rv1630[0]	rpsA	30S ribosomal protein S1	4.30375	Down	0.00916271
Rv1633[0]	uvrB	UvrABC system protein B	14.1159	Down	2.11e-06
Rv1634[0]	-	Drug transporter, putative	4.7732	Down	0.00318064
Rv1638[0]	uvrA	UvrABC system protein A	30.6058	Down	0.000849
Rv1668c[0]	-	PROBABLE FIRST PART OF MACROLIDE-TRANSPORT ATP-BINDING PROTEIN ABC TRANSPORTER	3.17253	Down	0.0213141
Rv1735c[0]	-	HYPOTHETICAL MEMBRANE PROTEIN	4.67525	Down	0.00489077
Rv1741[0]	-	Putative uncharacterized protein	2.53034	Down	0.0435012
Rv1782[0]	-	PROBABLE CONSERVED MEMBRANE PROTEIN	2.1644	Down	0.0310661
Rv1832[0]	gcvP	Probable glycine dehydrogenase [decarboxylating]	2.50878	Down	0.000731
Rv1841c[0]	-	Uncharacterized protein Rv1841c/MT1889	2.92668	Down	0.00851943
Rv1886c[0]	fbpB	Antigen 85-B	2.29157	Down	0.00335382
Rv1979c[0]	-	Uncharacterized transporter Rv1979c/MT2031	2.6495	Down	3.18e-05
Rv1980c[0]	mpt64	Immunogenic protein MPT64	2.64186	Down	0.00277599
Rv1990c[0]	-	Uncharacterized protein Rv1990c/MT2044	4.14129	Down	0.0357279
Rv1992c[0]	ctpG	Probable cation-transporting ATPase G	8.07396	Down	0.0113039
Rv2025c[0]	-	Cation efflux system protein	4.91325	Down	0.000314
Rv2051c[0]	ppm1	Polyprenol-monophosphomannose synthase Ppm1	2.84943	Down	0.0035463
Rv2086[0]	-	Uncharacterized protein Rv2086	2.61078	Down	0.0319667
Rv2102[0]	-	Putative uncharacterized protein	2.68262	Down	0.00365969
Rv2107[0]	PE22	PE FAMILY PROTEIN	5.43056	Down	0.00461829
Rv2190c[0]	-	Uncharacterized protein Rv2190c/MT2245	2.5323	Down	0.0419015
Rv2203[0]	-	Uncharacterized protein Rv2203/MT2259	2.47437	Down	0.0329936
Rv2282c[0]	-	Uncharacterized HTH-type transcriptional regulator Rv2282c/MT2340	3.5273	Down	0.0202472
Rv2368c[0]	-	PhoH-like protein	2.63646	Down	0.032925
Rv2398c[0]	cysW	PROBABLE SULFATE-TRANSPORT INTEGRAL MEMBRANE PROTEIN ABC TRANSPORTER CYSW	3.1904	Down	0.02123
Rv2419c[0]	-	PROBABLE PHOSPHOGLYCERATE MUTASE (PHOSPHOGLYCEROMUTASE)	4.39696	Down	0.0328261
Rv2440c[0]	obg	GTPase obg	2.85631	Down	0.0165213
Rv2445c[0]	ndkA	Nucleoside diphosphate kinase	2.60504	Down	0.0203424
Rv2453c[0]	mobA	Probable molybdopterin-guanine dinucleotide biosynthesis protein A	2.84095	Down	0.0239485
Rv2455c[0]	-	PROBABLE OXIDOREDUCTASE (ALPHA SUBUNIT)	2.94298	Down	0.0284877
Rv2504c[0]	scoA	Probable succinyl-CoA:3-ketoacid-coenzyme A transferase subunit A	2.21373	Down	0.0319393
Rv2527[0]	-	Putative uncharacterized protein	6.17247	Down	0.0156141
Rv2555c[0]	alaS	Alanyl-tRNA synthetase	3.1889	Down	0.0151182
Rv2572c[0]	aspS	Aspartyl-tRNA synthetase	2.43423	Down	0.0367857
Rv2636[0]	-	Putative O-phosphotransferase Rv2636/MT2714	2.51444	Down	0.00196805
Rv2683[0]	-	CBS domain protein	2.39438	Down	0.012424
Rv2692[0]	trkA	Trk system potassium uptake protein trkA	3.50034	Down	0.00475572
Rv2696c[0]	-	CONSERVED HYPOTHETICAL ALANINE AND GLYCINE AND VALINE RICH PROTEIN	5.39131	Down	0.0467821
Rv2743c[0]	-	POSSIBLE CONSERVED TRANSMEMBRANE ALANINE RICH PROTEIN	2.46142	Down	0.028768
Rv2823c[0]	-	Putative uncharacterized protein	2.71977	Down	0.00170624
Rv2895c[0]	-	Uncharacterized protein Rv2895c/MT2963	3.53957	Down	0.0226954
Rv2896c[0]	-	Uncharacterized protein Rv2896c/MT2964	2.14984	Down	0.00196089
Rv2910c[0]	-	Uncharacterized protein Rv2910c/MT2978	6.90034	Down	0.000419
Rv2931[0]	ppsA	Phenolpthiocerol synthesis polyketide synthase ppsA	2.96725	Down	0.0325868
Rv2934[0]	ppsD	PHENOLPTHIOCEROL SYNTHESIS TYPE-I POLYKETIDE SYNTHASE PPSD	8.13091	Down	4.04e-06
Rv2936[0]	drrA	Antibiotic resistance ABC transporter, efflux system, ATP-binding protein	7.96139	Down	7.94e-06
Rv2937[0]	drrB	Antibiotic resistance ABC transporter, efflux protein	12.1944	Down	8.6e-06
Rv2962c[0]	-	PGL/p-HBAD biosynthesis rhamnosyltransferase	3.26512	Down	0.000223
Rv2963[0]	-	PROBABLE INTEGRAL MEMBRANE PROTEIN	2.26805	Down	0.0485826
Rv3011c[0]	gatA	Glutamyl-tRNA(Gln) amidotransferase subunit A	2.25791	Down	0.00504425
Rv3014c[0]	ligA	DNA ligase	11.7529	Down	0.000172
Rv3042c[0]	serB2	PROBABLE PHOSPHOSERINE PHOSPHATASE SERB2 (PSP) (O-PHOSPHOSERINE PHOSPHOHYDROLASE) (PSPASE)	2.82435	Down	0.00995374
Rv3065[0]	mmr	Multidrug resistance protein mmr	7.64301	Down	1.44e-05
Rv3074[0]	-	Putative uncharacterized protein	2.38837	Down	0.0190647
Rv3115[0]	-	PROBABLE TRANSPOSASE	4.30969	Down	0.0222622
Rv3117[0]	cysA1	Putative thiosulfate sulfurtransferase	2.33994	Down	0.0375412
Rv3133c[0]	devR	DNA-binding response regulator, LuxR family	2.69653	Down	0.0209239
Rv3143[0]	-	PROBABLE RESPONSE REGULATOR	13.0556	Down	0.00662647
Rv3146[0]	nuoB	NADH-quinone oxidoreductase subunit B	3.09584	Down	0.0258435
Rv3150[0]	nuoF	NADH-quinone oxidoreductase subunit F	2.09572	Down	0.0276901
Rv3173c[0]	-	PROBABLE TRANSCRIPTIONAL REGULATORY PROTEIN (PROBABLY TETR/ACRR-FAMILY)	2.11578	Down	0.036699
Rv3178[0]	-	Putative uncharacterized protein	2.82386	Down	0.0122796
Rv3183[0]	-	POSSIBLE TRANSCRIPTIONAL REGULATORY PROTEIN	2.03282	Down	0.0383359
Rv3189[0]	-	Putative uncharacterized protein	4.94658	Down	0.0493528
Rv3245c[0]	mtrB	Sensor histidine kinase mtrB	2.57854	Down	0.0200598
Rv3280[0]	accD5	Probable propionyl-CoA carboxylase beta chain 5	2.45739	Down	0.0461007
Rv3291c[0]	lrp	Leucine-responsive regulatory protein	2.60188	Down	0.0457655
Rv3328c[0]	sigJ	PROBABLE ALTERNATIVE RNA POLYMERASE SIGMA FACTOR SIGJ	4.88303	Down	0.0190664
Rv3369[0]	-	Putative uncharacterized protein	3.62391	Down	0.00662095
Rv3399[0]	-	Putative S-adenosyl-L-methionine-dependent methyltransferase Rv3399/MT3507	2.29799	Down	0.0222862
Rv3482c[0]	-	Putative uncharacterized protein	3.38476	Down	0.0040009
Rv3490[0]	otsA	Trehalose-phosphate synthase	2.44506	Down	0.0051848
Rv3519[0]	-	Putative uncharacterized protein	2.71589	Down	0.0471019
Rv3567c[0]	-	Oxidoreductase, putative	2.49974	Down	0.000134
Rv3587c[0]	-	PROBABLE CONSERVED MEMBRANE PROTEIN	2.55914	Down	0.0100678
Rv3672c[0]	-	Putative uncharacterized protein	2.80444	Down	0.0485585
Rv3681c[0]	whiB4	PROBABLE TRANSCRIPTIONAL REGULATORY PROTEIN WHIB-LIKE WHIB4	2.11795	Down	0.00955416
Rv3715c[0]	recR	Recombination protein recR	7.42437	Down	0.000233
Rv3718c[0]	-	Putative uncharacterized protein	2.17478	Down	0.014798
Rv3772[0]	pat	Putative phenylalanine aminotransferase	2.30755	Down	0.000158
Rv3776[0]	-	Putative uncharacterized protein	2.13167	Down	0.00413075
Rv3793[0]	embC	Probable arabinosyltransferase C	5.39353	Down	1.74e-05
Rv3831[0]	-	Putative uncharacterized protein	2.38197	Down	0.037772
Rv3842c[0]	glpQ1	PROBABLE GLYCEROPHOSPHORYL DIESTER PHOSPHODIESTERASE GLPQ1 (GLYCEROPHOSPHODIESTER PHOSPHODIESTERASE)	2.4941	Down	0.0455418
Rv3862c[0]	whiB6	POSSIBLE TRANSCRIPTIONAL REGULATORY PROTEIN WHIB-LIKE WHIB6	4.9628	Down	0.0077013
Rv3870[0]	-	FtsK/SpoIIIE family protein	3.42187	Down	0.0295039
TBFG_10851[0]	TBFG_10851, TBFG_00838	hypothetical protein	2.93212	Down	0.0154002
TBFG_11839[0]	TBFG_11839, TBFG_01803	PPE family protein	2.57936	Down	0.0130383
TBMG_00064[0]	TBMG_00064	antitoxin	3.06054	Down	0.0189967
TBMG_00681[0]	TBMG_00681	hypothetical protein	3.81465	Down	0.0226817
Rv0009[0]	ppiA	Probable peptidyl-prolyl cis-trans isomerase A	2.74837	Up	0.00494994
Rv0076c[0]	-	PROBABLE MEMBRANE PROTEIN	2.33746	Up	0.0423549
Rv0103c[0]	ctpB	Cation-transporting P-type ATPase B	2.08193	Up	0.0344508
Rv0148[0]	-	PROBABLE SHORT-CHAIN TYPE DEHYDROGENASE/REDUCTASE	2.50112	Up	0.0490063
Rv0465c[0]	-	Uncharacterized HTH-type transcriptional regulator Rv0465c/MT0481	3.17643	Up	0.0269012
Rv0473[0]	-	POSSIBLE CONSERVED TRANSMEMBRANE PROTEIN	3.76063	Up	0.0275943
Rv0572c[0]	-	Putative uncharacterized protein	2.25892	Up	0.032153
Rv0632c[0]	echA3	Enoyl-CoA hydratase/isomerase family protein	2.42409	Up	0.043333
Rv0724[0]	sppA	POSSIBLE PROTEASE IV SPPA (ENDOPEPTIDASE IV) (SIGNAL PEPTIDE PEPTIDASE)	2.538	Up	0.0055921
Rv0755.1[0]	-	PUTATIVE TRANSPOSASE	2.44996	Up	0.0420209
Rv1149[0]	-	POSSIBLE TRANSPOSASE	2.84722	Up	0.0341369
Rv1159.1[0]	-	Putative pterin-4-alpha-carbinolamine dehydratase	2.44233	Up	0.0345615
Rv1194c[0]	-	Putative uncharacterized protein	3.02519	Up	0.0293576
Rv1229c[0]	mrp	Protein mrp homolog	3.42218	Up	0.0150403
Rv1249c[0]	-	POSSIBLE MEMBRANE PROTEIN	2.2261	Up	0.0167973
Rv1259[0]	-	Uncharacterized protein Rv1259/MT1297.1	2.13027	Up	0.0215486
Rv1336[0]	cysM	Cysteine synthase B	2.24727	Up	0.0461459
Rv1352[0]	-	Uncharacterized protein Rv1352/MT1395	2.00391	Up	0.00237143
Rv1571[0]	-	Putative uncharacterized protein	3.13127	Up	0.0310545
Rv1683[0]	-	Possible long-chain acyl-CoA synthase	2.23493	Up	0.0224926
Rv1863c[0]	-	PROBABLE CONSERVED INTEGRAL MEMBRANE PROTEIN	2.9952	Up	0.00300943
Rv1884c[0]	rpfC	PROBABLE RESUSCITATION-PROMOTING FACTOR RPFC	2.6808	Up	0.0389396
Rv1891[0]	-	Putative uncharacterized protein	2.97822	Up	0.0412237
Rv1997[0]	ctpF	Probable cation-transporting ATPase F	2.29611	Up	0.0376524
Rv2028c[0]	-	Putative uncharacterized protein	3.31106	Up	0.0132377
Rv2032[0]	acg	Putative uncharacterized protein acg	2.98856	Up	0.0093793
Rv2034[0]	-	Probable ArsR-type repressor protein	3.02875	Up	0.00507283
Rv2036[0]	-	Putative uncharacterized protein	2.36739	Up	0.0266284
Rv2077c[0]	-	Uncharacterized protein Rv2077c/MT2137	4.75887	Up	0.0302502
Rv2080[0]	lppJ	Putative lipoprotein lppJ	2.11214	Up	0.049607
Rv2159c[0]	-	Putative uncharacterized protein	4.60419	Up	0.00170551
Rv2160.1[0]	-	Putative uncharacterized protein	3.60241	Up	0.0201403
Rv2160c[0]	-	Putative uncharacterized protein	5.30208	Up	0.0189433
Rv2230c[0]	-	UPF0135 protein Rv2230c/MT2289	2.10074	Up	0.0123167
Rv2260[0]	-	Putative uncharacterized protein	2.03293	Up	0.0406232
Rv2322c[0]	rocD1	PROBABLE ORNITHINE AMINOTRANSFERASE (N-terminus part) ROCD1 (ORNITHINE--OXO-ACID AMINOTRANSFERASE)	2.36935	Up	0.00365487
Rv2367c[0]	-	Putative metalloprotease Rv2367c/MT2436	3.08346	Up	0.0455682
Rv2557[0]	-	Uncharacterized protein Rv2557/MT2634	2.1356	Up	0.0199831
Rv2582[0]	ppiB	Probable peptidyl-prolyl cis-trans isomerase B	2.36939	Up	0.0478702
Rv2677c[0]	hemY	Protoporphyrinogen oxidase	2.75833	Up	0.0213257
Rv2695[0]	-	CONSERVED HYPOTHETICAL ALANINE RICH PROTEIN	3.08329	Up	0.0192871
Rv2725c[0]	hflX	PROBABLE GTP-BINDING PROTEIN HFLX	2.62795	Up	0.00789877
Rv2865[0]	-	Putative uncharacterized protein	3.49359	Up	0.0151904
Rv3228[0]	-	Putative uncharacterized protein	2.14816	Up	0.0218142
Rv3407[0]	-	Uncharacterized protein Rv3407/MT3515	13.5815	Up	7.07e-05
Rv3556c[0]	fadA6	PROBABLE ACETYL-CoA ACETYLTRANSFERASE FADA6 (ACETOACETYL-CoA THIOLASE)	2.43258	Up	0.0348809
Rv3652[0]	PE_PGRS60	PE-PGRS FAMILY-RELATED PROTEIN	4.50576	Up	0.0256792
Rv3719[0]	-	Putative uncharacterized protein	2.19749	Up	0.0282677
Rv3790[0]	-	PROBABLE OXIDOREDUCTASE	3.28251	Up	0.0360033
Rv3815c[0]	-	Acyltransferase family protein	2.74081	Up	0.0429674
Rv3832c[0]	-	Putative uncharacterized protein	2.01005	Up	0.0274098
Rv3913[0]	trxB	Thioredoxin reductase	2.31294	Up	0.0231433
Rv3917c[0]	parB	Probable chromosome-partitioning protein parB	3.64901	Up	0.00200673
		* Fold Change is defined as the ratio of normalized signal intensites of drug susceptible clinical Mtb and H37Rv

## Sheet: DS Beijing vs H37Rv
Differentially expressed genes of drug susceptible Beijing clinical isolates of Mtb as compared to H37Rv
Gene Accession Number	GeneSymbol	Description	*Fold Change	Regulation	p-value
MT1742[0]	MT1742	Putative uncharacterized protein	3.47539	Down	0.02253
MT3921[0]	MT3921	Putative uncharacterized protein	2.29198	Down	0.0475747
Rv0003[0]	recF	DNA replication and repair protein recF	7.04574	Down	0.048802
Rv0005[0]	gyrB	DNA gyrase subunit B	5.06477	Down	0.0124784
Rv0043c[0]	-	Uncharacterized HTH-type transcriptional regulator Rv0043c/MT0049	3.7146	Down	0.0129003
Rv0105c[0]	rpmB1	50S ribosomal protein L28-1	3.41883	Down	0.000645
Rv0120c[0]	-	Elongation factor G-like protein	4.72741	Down	0.0177613
Rv0139[0]	-	Dihydroflavonol 4-reductase-related protein	4.27944	Down	0.00416695
Rv0163[0]	-	Putative uncharacterized protein	6.13376	Down	0.0117344
Rv0187[0]	-	PROBABLE O-METHYLTRANSFERASE	2.60186	Down	0.00194584
Rv0197[0]	-	POSSIBLE OXIDOREDUCTASE	2.09223	Down	0.0360311
Rv0278c[0]	PE_PGRS3	Uncharacterized PE-PGRS family protein PE_PGRS3	4.65327	Down	0.0268209
Rv0316[0]	-	Muconolactone isomerase, putative	2.20804	Down	0.013355
Rv0340[0]	-	Putative uncharacterized protein	2.54923	Down	0.0306875
Rv0542c[0]	menE	O-succinylbenzoate--CoA ligase	5.37011	Down	0.0289575
Rv0551c[0]	fadD8	PROBABLE FATTY-ACID-CoA LIGASE FADD8 (FATTY-ACID-CoA SYNTHETASE) (FATTY-ACID-CoA SYNTHASE)	3.77951	Down	0.0287594
Rv0552[0]	-	Putative uncharacterized protein	3.21329	Down	0.0276726
Rv0568[0]	CYP135B1	Putative cytochrome P450 135B1	2.30168	Down	0.0109771
Rv0606[0]	-	POSSIBLE TRANSPOSASE	2.98363	Down	0.0227046
Rv0630c[0]	recB	Exodeoxyribonuclease V beta chain	16.4073	Down	0.00181719
Rv0635[0]	-	UPF0336 protein Rv0635/MT0664	5.47093	Down	0.0294878
Rv0735[0]	sigL	RNA polymerase sigma factor	3.69309	Down	0.0134343
Rv0749[0]	-	Putative uncharacterized protein	2.49569	Down	0.0272326
Rv0753c[0]	mmsA	PROBABLE METHYLMALONATE-SEMIALDEHYDE DEHYDROGENASE MMSA (METHYLMALONIC ACID SEMIALDEHYDE DEHYDROGENASE) (MMSDH)	4.73898	Down	0.0143194
Rv0783c[0]	emrB	POSSIBLE MULTIDRUG RESISTANCE INTEGRAL MEMBRANE EFFLUX PROTEIN EMRB	10.8683	Down	0.000233
Rv0816c[0]	thiX	PROBABLE THIOREDOXIN THIX	2.89414	Down	0.0184159
Rv0838[0]	lpqR	PROBABLE CONSERVED LIPOPROTEIN LPQR	3.2712	Down	0.0230731
Rv0875c[0]	-	Uncharacterized protein Rv0875c/MT0898	5.58554	Down	0.00365738
Rv0876c[0]	-	Uncharacterized protein Rv0876c/MT0899	2.13759	Down	0.0352142
Rv0906[0]	-	Uncharacterized protein Rv0906/MT0929	2.65461	Down	0.0338243
Rv0965c[0]	-	Uncharacterized protein Rv0965c/MT0993	2.48246	Down	0.0435597
Rv1008[0]	tatD	PROBABLE DEOXYRIBONUCLEASE TATD (YJJV PROTEIN)	2.1852	Down	0.0252826
Rv1022[0]	lpqU	PROBABLE CONSERVED LIPOPROTEIN LPQU	5.24166	Down	0.000878
Rv1023[0]	eno	Enolase	3.45859	Down	0.0399745
Rv1024[0]	-	POSSIBLE CONSERVED MEMBRANE PROTEIN	2.5277	Down	0.0432523
Rv1034c[0]	-	IS1560' protein	2.1547	Down	0.0223776
Rv1064c[0]	lpqV	Putative lipoprotein lpqV	2.10621	Down	0.0175336
Rv1084[0]	-	Putative uncharacterized protein	2.15455	Down	0.0381021
Rv1088[0]	PE9	PE FAMILY PROTEIN	3.4984	Down	0.0206498
Rv1090[0]	celA2b	Cellulase-related protein	4.20548	Down	0.0186393
Rv1104[0]	-	POSSIBLE PARA-NITROBENZYL ESTERASE	2.04218	Down	0.0212976
Rv1118c[0]	-	Putative uncharacterized protein	7.50526	Down	0.0266822
Rv1119c[0]	-	Putative uncharacterized protein	2.75367	Down	0.013731
Rv1127c[0]	ppdK	PROBABLE PYRUVATE, PHOSPHATE DIKINASE PPDK	2.99798	Down	0.0402876
Rv1203c[0]	-	Putative uncharacterized protein	8.15299	Down	0.0474117
Rv1266c[0]	pknH	Probable serine/threonine-protein kinase pknH	3.40541	Down	0.0110838
Rv1269c[0]	-	Protein Rv1269c/MT1307	2.81492	Down	0.0348241
Rv1290c[0]	-	Uncharacterized protein Rv1290c/MT1328	3.45208	Down	0.0279665
Rv1377c[0]	-	PUTATIVE TRANSFERASE	3.10118	Down	0.000772
Rv1379[0]	pyrR	Bifunctional protein pyrR	2.31247	Down	0.0460246
Rv1404[0]	-	PROBABLE TRANSCRIPTIONAL REGULATORY PROTEIN	2.54293	Down	0.0382807
Rv1443c[0]	-	Putative uncharacterized protein	2.52019	Down	0.0269805
Rv1475c[0]	acn	Aconitate hydratase	2.58089	Down	0.0403434
Rv1476[0]	-	POSSIBLE MEMBRANE PROTEIN	3.35348	Down	0.0359489
Rv1522c[0]	mmpL12	Putative membrane protein mmpL12	2.925	Down	0.00652503
Rv1527c[0]	pks5	Probable polyketide synthase pks5	3.16583	Down	0.000124
Rv1552[0]	frdA	Fumarate reductase flavoprotein subunit	3.1928	Down	0.00792129
Rv1683[0]	-	Possible long-chain acyl-CoA synthase	4.53725	Down	0.0394426
Rv1688[0]	-	Putative 3-methyladenine DNA glycosylase	2.9465	Down	0.0341675
Rv1712[0]	cmk	Cytidylate kinase	4.28833	Down	0.0345853
Rv1734c[0]	-	Putative uncharacterized protein	2.69576	Down	0.0304163
Rv1766[0]	-	Putative uncharacterized protein	5.69773	Down	0.0414675
Rv1790[0]	PPE27	PPE FAMILY PROTEIN	5.1248	Down	0.0496793
Rv1803c[0]	PE_PGRS32	PE-PGRS FAMILY PROTEIN	5.42332	Down	0.0425856
Rv1841c[0]	-	Uncharacterized protein Rv1841c/MT1889	4.70658	Down	0.00609476
Rv1851[0]	ureF	Urease accessory protein ureF	2.07793	Down	0.0145023
Rv1853[0]	ureD	Probable urease accessory protein ureD	2.52907	Down	0.0371418
Rv1891[0]	-	Putative uncharacterized protein	4.06633	Down	0.0118045
Rv1930c[0]	-	Putative uncharacterized protein	7.27744	Down	0.02319
Rv2008c[0]	-	Uncharacterized protein Rv2008c/MT2064	5.31694	Down	0.018733
Rv2033c[0]	-	Putative uncharacterized protein	3.05826	Down	0.0144021
Rv2046[0]	lppI	Probable lipoprotein lppI	12.3172	Down	0.0247993
Rv2049c[0]	-	Putative uncharacterized protein	4.4666	Down	0.0469473
Rv2091c[0]	-	Uncharacterized protein Rv2091c/MT2152	2.82385	Down	0.0181809
Rv2117[0]	-	Putative uncharacterized protein	4.75865	Down	0.0457934
Rv2130c[0]	cysS2	Putative cysteinyl-tRNA synthetase 2	2.62918	Down	0.00129573
Rv2250c[0]	-	Uncharacterized HTH-type transcriptional regulator Rv2250c/MT2310	4.87564	Down	0.0161699
Rv2266[0]	cyp124	Putative cytochrome P450 124	2.20412	Down	0.0180094
Rv2284[0]	lipM	Carboxylesterase, putative	3.33859	Down	0.00148181
Rv2298[0]	-	Uncharacterized oxidoreductase Rv2298/MT2355	3.77675	Down	0.0238405
Rv2308[0]	-	Uncharacterized protein Rv2308/MT2366	3.22309	Down	0.00413833
Rv2313c[0]	-	Uncharacterized protein Rv2313c/MT2376	2.54736	Down	0.00115316
Rv2371[0]	PE_PGRS40	PE-PGRS FAMILY PROTEIN	4.22894	Down	0.0104425
Rv2404c[0]	lepA	GTP-binding protein lepA	3.59061	Down	0.0211285
Rv2415c[0]	-	Putative uncharacterized protein	2.35825	Down	0.00801994
Rv2433c[0]	-	Putative uncharacterized protein	5.51357	Down	0.0201391
Rv2438.1[0]	-	Putative uncharacterized protein	3.59851	Down	0.0268746
Rv2490c[0]	PE_PGRS43	PE-PGRS FAMILY PROTEIN	13.109	Down	0.025987
Rv2565[0]	-	Uncharacterized NTE family protein Rv2565/MT2641	3.30056	Down	0.00280035
Rv2592c[0]	ruvB	Holliday junction ATP-dependent DNA helicase ruvB	5.95664	Down	0.0112923
Rv2606c[0]	pdxS	Pyridoxal biosynthesis lyase pdxS	6.91921	Down	0.0161223
Rv2636[0]	-	Putative O-phosphotransferase Rv2636/MT2714	4.04638	Down	0.043268
Rv2728c[0]	-	CONSERVED HYPOTHETICAL ALANINE RICH PROTEIN	8.27624	Down	0.0215105
Rv2737c[0]	recA	Protein recA	4.83436	Down	0.00404804
Rv2755c[0]	hsdS.1	HsdS-related protein	3.88511	Down	0.000368
Rv2781c[0]	-	2-nitropropane dioxygenase, putative	2.83996	Down	0.023588
Rv2854[0]	-	Putative uncharacterized protein	3.34959	Down	0.00881371
Rv2892c[0]	ppe45	Uncharacterized PPE family protein PPE45	6.95315	Down	0.0203815
Rv2902c[0]	rnhB	Ribonuclease HII	2.5519	Down	0.0413353
Rv2920c[0]	amt	Probable ammonia channel	2.2735	Down	0.0372018
Rv2932[0]	ppsB	Phenolpthiocerol synthesis polyketide synthase ppsB	2.62621	Down	0.0346715
Rv2956[0]	-	Putative uncharacterized protein	2.66381	Down	0.0477678
Rv2958c[0]	-	PGL/p-HBAD biosynthesis glycosyltransferase Rv2958c/MT3034	2.81186	Down	0.0281568
Rv2993c[0]	-	2-hydroxyhepta-2,4-diene-1,7-dioate isomerase, putative	2.02615	Down	0.0160672
Rv3000[0]	-	ABC transporter, ATP-binding protein	3.23906	Down	0.00232269
Rv3032[0]	-	Glycosyl transferase	4.71025	Down	0.00543962
Rv3058c[0]	-	POSSIBLE TRANSCRIPTIONAL REGULATORY PROTEIN (PROBABLY TETR-FAMILY)	4.99192	Down	0.0103252
Rv3061c[0]	fadE22	Acyl-CoA dehydrogenase, putative	3.37262	Down	0.0453421
Rv3072c[0]	-	Putative uncharacterized protein	2.251	Down	0.0104419
Rv3121[0]	cyp141	Putative cytochrome P450 141	2.4882	Down	0.0260427
Rv3167c[0]	-	PROBABLE TRANSCRIPTIONAL REGULATORY PROTEIN (PROBABLY TETR-FAMILY)	2.54943	Down	0.0171758
Rv3179[0]	-	Putative uncharacterized protein	2.79395	Down	0.034382
Rv3269[0]	IrpA	Putative uncharacterized protein	2.26224	Down	0.0434889
Rv3329[0]	-	PROBABLE AMINOTRANSFERASE	3.68657	Down	0.0206685
Rv3339c[0]	icd	Isocitrate dehydrogenase [NADP]	2.88964	Down	0.0368614
Rv3369[0]	-	Putative uncharacterized protein	2.98082	Down	0.00133755
Rv3395c[0]	-	Uncharacterized protein Rv3395c/MT3502	2.59202	Down	0.0183048
Rv3409c[0]	choD	PROBABLE CHOLESTEROL OXIDASE CHOD (CHOLESTEROL-O2 OXIDOREDUCTASE)	2.20857	Down	0.00312997
Rv3464[0]	rmlB	dTDP-glucose 4,6-dehydratase	6.1523	Down	0.00216088
Rv3490[0]	otsA	Trehalose-phosphate synthase	2.06727	Down	0.00250781
Rv3550[0]	echA20	Enoyl-CoA hydratase/isomerase family protein	2.59095	Down	0.0444237
Rv3627c[0]	-	Putative uncharacterized protein	2.20263	Down	0.0426339
Rv3635[0]	-	PROBABLE CONSERVED TRANSMEMBRANE PROTEIN	2.00319	Down	0.00212174
Rv3671c[0]	-	POSSIBLE MEMBRANE-ASSOCIATED SERINE PROTEASE	3.86777	Down	0.0310434
Rv3704c[0]	gshA	GLUTAMATE--CYSTEINE LIGASE GSHA (GAMMA-GLUTAMYLCYSTEINE SYNTHETASE) (GAMMA-ECS) (GCS) (GAMMA-GLUTAMYL-L-CYSTEINE SYNTHETASE)	6.75303	Down	0.0207734
Rv3708c[0]	asd	Aspartate-semialdehyde dehydrogenase	2.25208	Down	0.0273185
Rv3729[0]	-	MoaA/nifB/pqqE family protein	7.26367	Down	0.0272446
Rv3771c[0]	-	Putative uncharacterized protein	2.77459	Down	0.000569
Rv3773c[0]	-	Putative uncharacterized protein	4.06345	Down	0.00691961
Rv3775[0]	lipE	PROBABLE LIPASE LIPE	2.6743	Down	0.016037
Rv3781[0]	rfbE	O-antigen export system, ATP-binding protein	3.56878	Down	0.0162363
Rv3785[0]	-	Uncharacterized protein Rv3785/MT3893	2.69618	Down	0.0275534
Rv3795[0]	embB	Probable arabinosyltransferase B	2.93543	Down	0.0243002
Rv3844[0]	-	IS1608', transposase	3.13161	Down	9.12e-05
Rv3899c[0]	-	Putative uncharacterized protein	3.44727	Down	0.000876
Rv3911[0]	sigM	POSSIBLE ALTERNATIVE RNA POLYMERASE SIGMA FACTOR SIGM	16.4115	Down	2e-06
Rv3920c[0]	-	Putative uncharacterized protein	4.16208	Down	0.0355775
TBMG_01673[0]	TBMG_01673	hypothetical protein	4.43091	Down	0.00508781
TBMG_04093[0]	TBMG_04093	hypothetical protein	4.2736	Down	0.0383628
Rv0049[0]	-	Uncharacterized protein Rv0049/MT0055	2.07273	Up	0.0278277
Rv0144[0]	-	PROBABLE TRANSCRIPTIONAL REGULATORY PROTEIN (POSSIBLY TETR-FAMILY)	3.17645	Up	0.014505
Rv0328[0]	-	POSSIBLE TRANSCRIPTIONAL REGULATORY PROTEIN (POSSIBLY TETR/ACRR-FAMILY)	3.21786	Up	0.0403515
Rv0351[0]	grpE	Protein grpE	3.96277	Up	0.0330013
Rv0462[0]	lpd	Dihydrolipoyl dehydrogenase	2.36268	Up	0.0471774
Rv0476[0]	-	Uncharacterized protein Rv0476/MT0494.1	3.51491	Up	0.00213231
Rv0570[0]	nrdZ	Ribonucleoside-diphosphate reductase	2.01498	Up	0.0321328
Rv0626[0]	-	Putative uncharacterized protein	2.09425	Up	0.0389544
Rv0659c[0]	-	Putative uncharacterized protein	8.37277	Up	0.0240996
Rv0706[0]	rplV	50S ribosomal protein L22	3.19759	Up	0.0445572
Rv0768[0]	aldA	Aldehyde dehydrogenase	2.35158	Up	0.0350829
Rv1149[0]	-	POSSIBLE TRANSPOSASE	2.40638	Up	0.0310097
Rv1194c[0]	-	Putative uncharacterized protein	3.11846	Up	0.0286966
Rv1221[0]	sigE	ALTERNATIVE RNA POLYMERASE SIGMA FACTOR SIGE	8.46727	Up	0.0491532
Rv1229c[0]	mrp	Protein mrp homolog	2.04966	Up	0.0425128
Rv1285[0]	cysD	Sulfate adenylyltransferase subunit 2	4.79169	Up	0.0228008
Rv1336[0]	cysM	Cysteine synthase B	3.27197	Up	0.00511098
Rv1461[0]	-	UPF0051 protein Rv1461/MT1508	3.57919	Up	0.0104507
Rv1462[0]	-	UPF0051 protein Rv1462/MT1509	4.24603	Up	0.0384418
Rv1586c[0]	-	Probable phiRv1 integrase	2.88187	Up	0.049669
Rv1736c[0]	narX	PROBABLE NITRATE REDUCTASE NARX	2.9049	Up	0.0319783
Rv1765c[0]	-	Putative uncharacterized protein	2.55159	Up	0.043669
Rv1796[0]	mycP5	PROBABLE PROLINE RICH MEMBRANE-ANCHORED MYCOSIN MYCP5 (SERINE PROTEASE) (SUBTILISIN-LIKE PROTEASE) (SUBTILASE-LIKE) (MYCOSIN-5)	3.19018	Up	0.0452887
Rv1808[0]	ppe32	Uncharacterized PPE family protein PPE32	2.11723	Up	0.0315182
Rv1809[0]	ppe33	Uncharacterized PPE family protein PPE33	2.58139	Up	0.0465557
Rv1909c[0]	fur	Ferric uptake regulation protein	3.27983	Up	0.00466344
Rv1997[0]	ctpF	Probable cation-transporting ATPase F	2.87114	Up	0.00499552
Rv2016[0]	-	Putative uncharacterized protein	2.86751	Up	0.00264666
Rv2028c[0]	-	Putative uncharacterized protein	3.61437	Up	0.00580143
Rv2032[0]	acg	Putative uncharacterized protein acg	3.02909	Up	0.00647057
Rv2034[0]	-	Probable ArsR-type repressor protein	3.21976	Up	0.000711
Rv2036[0]	-	Putative uncharacterized protein	2.25967	Up	0.0322362
Rv2077c[0]	-	Uncharacterized protein Rv2077c/MT2137	4.19713	Up	0.0386726
Rv2210c[0]	ilvE	Probable branched-chain-amino-acid aminotransferase	2.69971	Up	0.010375
Rv2270[0]	lppN	Putative lipoprotein lppN	2.49824	Up	0.048996
Rv2393[0]	-	Putative uncharacterized protein	3.13968	Up	0.0117891
Rv2400c[0]	subI	PROBABLE SULFATE-BINDING LIPOPROTEIN SUBI	2.07368	Up	0.0313798
Rv2596[0]	-	Uncharacterized protein Rv2596/MT2672	4.19744	Up	0.0174435
Rv2633c[0]	-	Uncharacterized protein Rv2633c/MT2709	10.2978	Up	0.0235946
Rv2743c[0]	-	POSSIBLE CONSERVED TRANSMEMBRANE ALANINE RICH PROTEIN	4.29979	Up	0.0130134
Rv2865[0]	-	Putative uncharacterized protein	3.68287	Up	0.0133686
Rv2913c[0]	-	Uncharacterized protein Rv2913c/MT2981	2.11084	Up	0.0165589
Rv3099c[0]	-	Putative uncharacterized protein	3.63774	Up	0.0262637
Rv3126c[0]	-	Putative uncharacterized protein	2.56643	Up	0.0428996
Rv3131[0]	-	Putative uncharacterized protein	6.5365	Up	0.0278441
Rv3136[0]	ppe51	Uncharacterized PPE family protein PPE51	4.62679	Up	0.0121134
Rv3222c[0]	-	Putative uncharacterized protein	2.79164	Up	0.0372281
Rv3252c[0]	alkB	Alkane-1 monooxygenase	3.2619	Up	0.0482302
Rv3407[0]	-	Uncharacterized protein Rv3407/MT3515	11.8581	Up	0.000154
Rv3461c[0]	rpmJ	50S ribosomal protein L36	4.58652	Up	0.0188612
Rv3572[0]	-	Putative uncharacterized protein	2.15495	Up	0.0368696
Rv3624c[0]	hpt	Hypoxanthine-guanine phosphoribosyltransferase	2.06973	Up	0.0496662
Rv3699[0]	-	Putative uncharacterized protein	2.51123	Up	0.0138984
Rv3838c[0]	pheA	Prephenate dehydratase	3.97571	Up	0.0137331
Rv3841[0]	bfrB	Ferritin family protein	30.0277	Up	0.0416523
Rv3863[0]	-	HYPOTHETICAL ALANINE RICH PROTEIN	2.66636	Up	0.0281462
Rv3872[0]	PE35	PE FAMILY-RELATED PROTEIN	3.2487	Up	0.036612
Rv3879c[0]	-	HYPOTHETICAL ALANINE AND PROLINE RICH PROTEIN	4.93481	Up	0.0388947
Rv3914[0]	trxA	Thioredoxin	3.66032	Up	0.0127246
TBFG_10402[0]	TBFG_10402, TBFG_00394	hypothetical protein	2.17212	Up	0.0355403
		* Fold Change is defined as the ratio of normalized signal intensites of drug susceptible clinical Mtb and H37Rv
